# Supplementary material for: scEpiLock: A Weakly Supervised Learning Framework for cis-Regulatory Element Localization and Variant Impact Quantification for Single-Cell Epigenetic Data
Source: MDPI journal article supplement (doi:10.3390/biom12070874), 2022-06-23
Supplement: s1 [file s1]

# **Supplementary Notes for scEpiLock: A Weakly-Supervised Learning Framework for cis-Regulatory Element Localization and Variant Impact Quantification for Single-Cell Epigenetic Data**

**Yanwen Gong<sup>1,2</sup>, Shushrruth Sai Srinivasan<sup>3</sup>, Ruiyi Zhang<sup>3</sup>, Kai Kessenbrock<sup>1,2,\*</sup> and Jing Zhang<sup>3,\*</sup>**

<sup>1</sup>Center for Complex Biological Systems, University of California, Irvine, CA 92697, USA

<sup>2</sup>Department of Biological Chemistry, School of Medicine, University of California, Irvine, CA 92697, USA

<sup>3</sup>Department of Computer Science, University of California, Irvine, CA 92697, USA

\*To whom correspondence should be addressed.

## Table of Contents

|                                                                                                                                  |           |
|----------------------------------------------------------------------------------------------------------------------------------|-----------|
| <b>Note S1 Detailed specifications of the architectures and hyperparameters of scEpiLock multi-label classifier module .....</b> | <b>3</b>  |
| <b>Supplementary Figures .....</b>                                                                                               | <b>4</b>  |
| <i>Figure S1 Positive label distribution for each peak of PBMC.....</i>                                                          | <i>4</i>  |
| <i>Figure S2 Positive label distribution for each peak of the brain data .....</i>                                               | <i>5</i>  |
| <i>Supplementary Figure 3 Transfer learning improves multi-label classifier's performance on small scATAC-seq dataset.....</i>   | <i>6</i>  |
| <i>Figure S4 Visualization of scEpiLock identified functional SNP rs10769263.....</i>                                            | <i>7</i>  |
| <b>Table S1 ENCODE Bulk ATAC-seq Sample List for Transfer Learning.....</b>                                                      | <b>8</b>  |
| <b>Table S2 Computing Power and Processing Time for Each Model.....</b>                                                          | <b>21</b> |
| <b>Table S3 H3K27ac Enrichment in Key and Non-key Regions.....</b>                                                               | <b>22</b> |

## Note S1 Detailed specifications of the architectures and hyperparameters of scEpiLock multi-label classifier module

scEpiLock uses a multilayer CNN model, which contains four convolutional layers, two pooling layers and two dense fully connected layers. The filters in the convolutional layers are trained to recognize the CREs. The dense fully connected dense layers combine the learnt information and output the cell-type specific peak accessible score. The model is organized into a sequential layer-by-layer structure with each layer as a functional transformation.

Model Architecture:

1. Convolution layer (320 channels, kernel size 8, stride 1)
2. Convolution layer (480 channels, kernel size 8, stride 1)
3. Max pooling layer (kernel size 4, stride 4)
4. Convolution layer (960 channels, kernel size 4, stride 1)
5. Max pooling layer (kernel size 4, stride 4)
6. Convolution layer (1024 channels, kernel size 4, stride 1)
7. Fully connected layer1
8. Fully connected layer2

To avoid overfitting, we added dropouts to randomly set a proportion of neuron activations to a value of 0.

Dropout proportion (proportion of outputs randomly set to 0):

- Layer3: 20%
- Layer5: 50%
- Layer6: 50%
- Other layers: 0%

## Supplementary Figures

Figure S1 Positive label distribution for each peak of PBMC

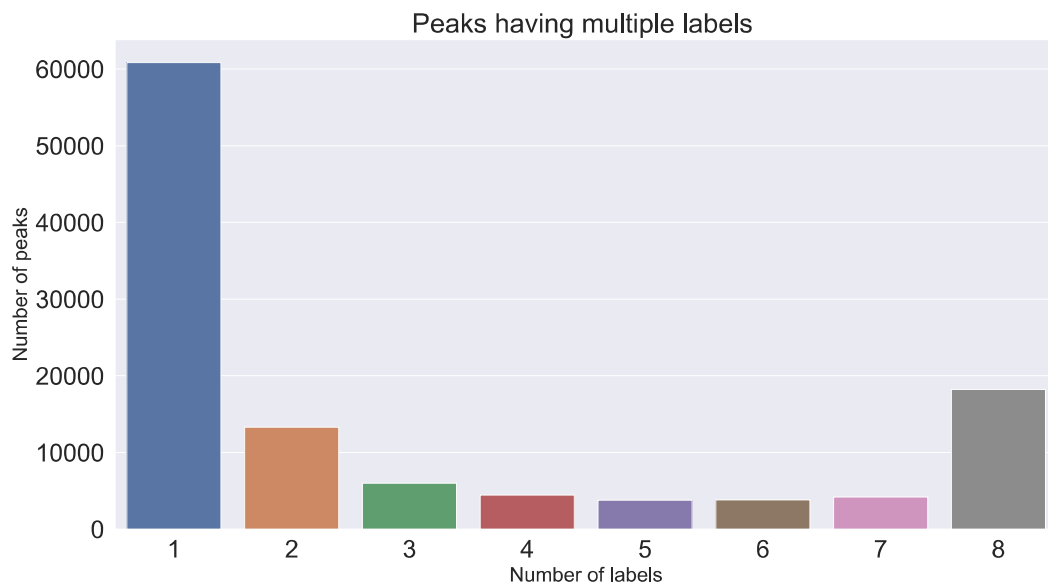

In the PBMC scATAC-seq data, 53.1% of peaks ( $n = 60,834$  peaks) are unique to one cell type while 15.9% of peaks ( $n = 18,209$  peaks) are shared among the eight cell types. Rest of the peaks are shared among two to seven cell types

Figure S2 Positive label distribution for each peak of the brain data

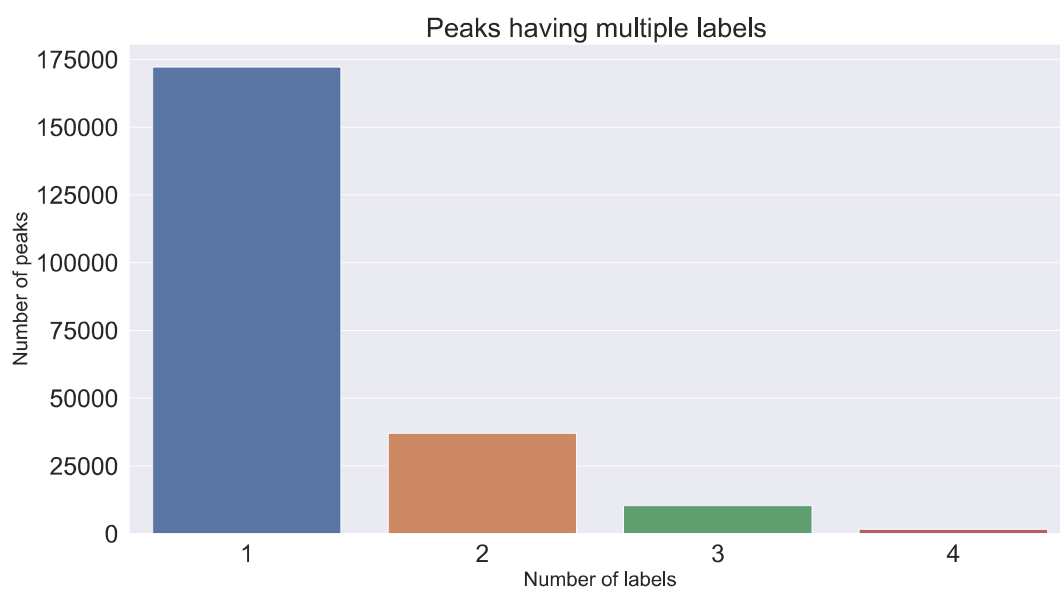

In the brain scATAC-seq data, 77.9% (n = 172,111 peaks) of peaks are specific to a single cell type and the rest of peaks are shared among at least two cell types

Supplementary Figure 3 Transfer learning improves multi-label classifier's performance on small scATAC-seq dataset

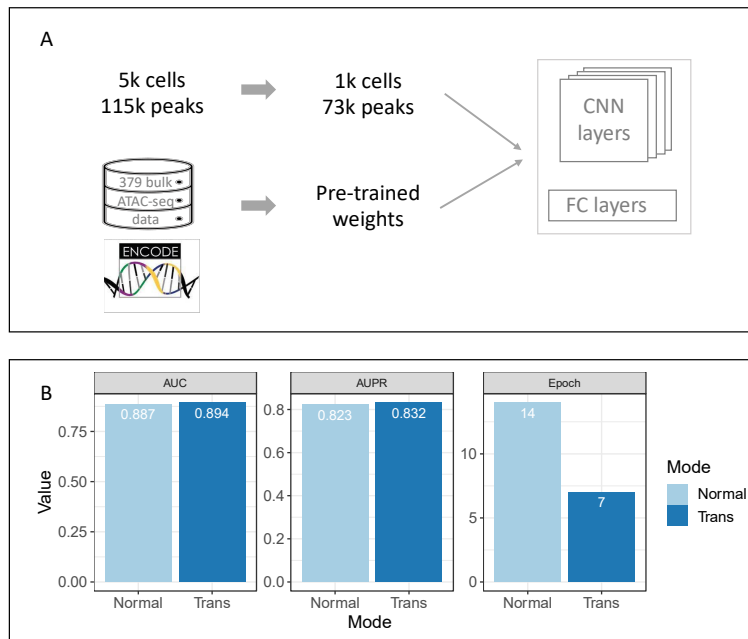

(A) ENCODE bulk ATAC-seq data was used to generate pre-trained weights of the classifier. The 5k PBMC data was filtered to only include 1k cells with 73k peaks representing a small scATAC-seq dataset. The pre-trained weights and subset dataset were fed into the multi-label classifier. (B) Transfer learning model achieved higher AUC and AUPR than model with random initiated weights. In addition, transfer learning reduced the training time to half of before.

Figure S4 Visualization of scEpiLock identified functional SNP rs10769263

Table S1 ENCODE Bulk ATAC-seq Sample List for Transfer Learning

| File.accession | Experiment.accession | File.download.URL                                                                                                                                                       |
|----------------|----------------------|-------------------------------------------------------------------------------------------------------------------------------------------------------------------------|
| ENCFF063AGI    | ENCSR554WGQ          | <a href="https://www.encodeproject.org/files/ENCFF063AGI/@download/ENCFF063AGI.bed.gz">https://www.encodeproject.org/files/ENCFF063AGI/@download/ENCFF063AGI.bed.gz</a> |
| ENCFF965AOW    | ENCSR383RDZ          | <a href="https://www.encodeproject.org/files/ENCFF965AOW/@download/ENCFF965AOW.bed.gz">https://www.encodeproject.org/files/ENCFF965AOW/@download/ENCFF965AOW.bed.gz</a> |
| ENCFF007FSO    | ENCSR684KUG          | <a href="https://www.encodeproject.org/files/ENCFF007FSO/@download/ENCFF007FSO.bed.gz">https://www.encodeproject.org/files/ENCFF007FSO/@download/ENCFF007FSO.bed.gz</a> |
| ENCFF132ATE    | ENCSR368FYV          | <a href="https://www.encodeproject.org/files/ENCFF132ATE/@download/ENCFF132ATE.bed.gz">https://www.encodeproject.org/files/ENCFF132ATE/@download/ENCFF132ATE.bed.gz</a> |
| ENCFF110LOX    | ENCSR220ASC          | <a href="https://www.encodeproject.org/files/ENCFF110LOX/@download/ENCFF110LOX.bed.gz">https://www.encodeproject.org/files/ENCFF110LOX/@download/ENCFF110LOX.bed.gz</a> |
| ENCFF008FUL    | ENCSR220ASC          | <a href="https://www.encodeproject.org/files/ENCFF008FUL/@download/ENCFF008FUL.bed.gz">https://www.encodeproject.org/files/ENCFF008FUL/@download/ENCFF008FUL.bed.gz</a> |
| ENCFF181FFW    | ENCSR220ASC          | <a href="https://www.encodeproject.org/files/ENCFF181FFW/@download/ENCFF181FFW.bed.gz">https://www.encodeproject.org/files/ENCFF181FFW/@download/ENCFF181FFW.bed.gz</a> |
| ENCFF463DJH    | ENCSR220ASC          | <a href="https://www.encodeproject.org/files/ENCFF463DJH/@download/ENCFF463DJH.bed.gz">https://www.encodeproject.org/files/ENCFF463DJH/@download/ENCFF463DJH.bed.gz</a> |
| ENCFF172ZTK    | ENCSR220ASC          | <a href="https://www.encodeproject.org/files/ENCFF172ZTK/@download/ENCFF172ZTK.bed.gz">https://www.encodeproject.org/files/ENCFF172ZTK/@download/ENCFF172ZTK.bed.gz</a> |
| ENCFF795ASF    | ENCSR220ASC          | <a href="https://www.encodeproject.org/files/ENCFF795ASF/@download/ENCFF795ASF.bed.gz">https://www.encodeproject.org/files/ENCFF795ASF/@download/ENCFF795ASF.bed.gz</a> |
| ENCFF516KWQ    | ENCSR220ASC          | <a href="https://www.encodeproject.org/files/ENCFF516KWQ/@download/ENCFF516KWQ.bed.gz">https://www.encodeproject.org/files/ENCFF516KWQ/@download/ENCFF516KWQ.bed.gz</a> |
| ENCFF744XPE    | ENCSR824DUE          | <a href="https://www.encodeproject.org/files/ENCFF744XPE/@download/ENCFF744XPE.bed.gz">https://www.encodeproject.org/files/ENCFF744XPE/@download/ENCFF744XPE.bed.gz</a> |
| ENCFF453BWQ    | ENCSR673ZMQ          | <a href="https://www.encodeproject.org/files/ENCFF453BWQ/@download/ENCFF453BWQ.bed.gz">https://www.encodeproject.org/files/ENCFF453BWQ/@download/ENCFF453BWQ.bed.gz</a> |
| ENCFF857VFO    | ENCSR180HEL          | <a href="https://www.encodeproject.org/files/ENCFF857VFO/@download/ENCFF857VFO.bed.gz">https://www.encodeproject.org/files/ENCFF857VFO/@download/ENCFF857VFO.bed.gz</a> |
| ENCFF766BZE    | ENCSR512YXO          | <a href="https://www.encodeproject.org/files/ENCFF766BZE/@download/ENCFF766BZE.bed.gz">https://www.encodeproject.org/files/ENCFF766BZE/@download/ENCFF766BZE.bed.gz</a> |
| ENCFF796GGQ    | ENCSR249FXU          | <a href="https://www.encodeproject.org/files/ENCFF796GGQ/@download/ENCFF796GGQ.bed.gz">https://www.encodeproject.org/files/ENCFF796GGQ/@download/ENCFF796GGQ.bed.gz</a> |
| ENCFF411CDL    | ENCSR939EVW          | <a href="https://www.encodeproject.org/files/ENCFF411CDL/@download/ENCFF411CDL.bed.gz">https://www.encodeproject.org/files/ENCFF411CDL/@download/ENCFF411CDL.bed.gz</a> |
| ENCFF785YXH    | ENCSR105SCQ          | <a href="https://www.encodeproject.org/files/ENCFF785YXH/@download/ENCFF785YXH.bed.gz">https://www.encodeproject.org/files/ENCFF785YXH/@download/ENCFF785YXH.bed.gz</a> |
| ENCFF916HWL    | ENCSR381LJX          | <a href="https://www.encodeproject.org/files/ENCFF916HWL/@download/ENCFF916HWL.bed.gz">https://www.encodeproject.org/files/ENCFF916HWL/@download/ENCFF916HWL.bed.gz</a> |
| ENCFF489VFL    | ENCSR940YDN          | <a href="https://www.encodeproject.org/files/ENCFF489VFL/@download/ENCFF489VFL.bed.gz">https://www.encodeproject.org/files/ENCFF489VFL/@download/ENCFF489VFL.bed.gz</a> |
| ENCFF209BNR    | ENCSR372IGW          | <a href="https://www.encodeproject.org/files/ENCFF209BNR/@download/ENCFF209BNR.bed.gz">https://www.encodeproject.org/files/ENCFF209BNR/@download/ENCFF209BNR.bed.gz</a> |
| ENCFF816FSQ    | ENCSR025MEO          | <a href="https://www.encodeproject.org/files/ENCFF816FSQ/@download/ENCFF816FSQ.bed.gz">https://www.encodeproject.org/files/ENCFF816FSQ/@download/ENCFF816FSQ.bed.gz</a> |
| ENCFF630QOE    | ENCSR400ISH          | <a href="https://www.encodeproject.org/files/ENCFF630QOE/@download/ENCFF630QOE.bed.gz">https://www.encodeproject.org/files/ENCFF630QOE/@download/ENCFF630QOE.bed.gz</a> |
| ENCFF796ZYH    | ENCSR419UYY          | <a href="https://www.encodeproject.org/files/ENCFF796ZYH/@download/ENCFF796ZYH.bed.gz">https://www.encodeproject.org/files/ENCFF796ZYH/@download/ENCFF796ZYH.bed.gz</a> |



|             |             |                                                                                                                                                                           |
|-------------|-------------|---------------------------------------------------------------------------------------------------------------------------------------------------------------------------|
| ENCFF728CSD | ENCSR712ZRY | <a href="https://www.encodeproject.org/files/ENCFF728CSD/@/download/ENCFF728CSD.bed.gz">https://www.encodeproject.org/files/ENCFF728CSD/@/download/ENCFF728CSD.bed.gz</a> |
| ENCFF816FTJ | ENCSR608KJD | <a href="https://www.encodeproject.org/files/ENCFF816FTJ/@/download/ENCFF816FTJ.bed.gz">https://www.encodeproject.org/files/ENCFF816FTJ/@/download/ENCFF816FTJ.bed.gz</a> |
| ENCFF624KRL | ENCSR905PWV | <a href="https://www.encodeproject.org/files/ENCFF624KRL/@/download/ENCFF624KRL.bed.gz">https://www.encodeproject.org/files/ENCFF624KRL/@/download/ENCFF624KRL.bed.gz</a> |
| ENCFF044HAG | ENCSR315QWI | <a href="https://www.encodeproject.org/files/ENCFF044HAG/@/download/ENCFF044HAG.bed.gz">https://www.encodeproject.org/files/ENCFF044HAG/@/download/ENCFF044HAG.bed.gz</a> |
| ENCFF976AUE | ENCSR604YEQ | <a href="https://www.encodeproject.org/files/ENCFF976AUE/@/download/ENCFF976AUE.bed.gz">https://www.encodeproject.org/files/ENCFF976AUE/@/download/ENCFF976AUE.bed.gz</a> |
| ENCFF961CHG | ENCSR312UCH | <a href="https://www.encodeproject.org/files/ENCFF961CHG/@/download/ENCFF961CHG.bed.gz">https://www.encodeproject.org/files/ENCFF961CHG/@/download/ENCFF961CHG.bed.gz</a> |
| ENCFF136RJT | ENCSR189VFC | <a href="https://www.encodeproject.org/files/ENCFF136RJT/@/download/ENCFF136RJT.bed.gz">https://www.encodeproject.org/files/ENCFF136RJT/@/download/ENCFF136RJT.bed.gz</a> |
| ENCFF305ZQQ | ENCSR278JWM | <a href="https://www.encodeproject.org/files/ENCFF305ZQQ/@/download/ENCFF305ZQQ.bed.gz">https://www.encodeproject.org/files/ENCFF305ZQQ/@/download/ENCFF305ZQQ.bed.gz</a> |
| ENCFF374TYJ | ENCSR839UOB | <a href="https://www.encodeproject.org/files/ENCFF374TYJ/@/download/ENCFF374TYJ.bed.gz">https://www.encodeproject.org/files/ENCFF374TYJ/@/download/ENCFF374TYJ.bed.gz</a> |
| ENCFF780EDM | ENCSR420RVW | <a href="https://www.encodeproject.org/files/ENCFF780EDM/@/download/ENCFF780EDM.bed.gz">https://www.encodeproject.org/files/ENCFF780EDM/@/download/ENCFF780EDM.bed.gz</a> |
| ENCFF761RRO | ENCSR615YIL | <a href="https://www.encodeproject.org/files/ENCFF761RRO/@/download/ENCFF761RRO.bed.gz">https://www.encodeproject.org/files/ENCFF761RRO/@/download/ENCFF761RRO.bed.gz</a> |
| ENCFF182SEJ | ENCSR954BDA | <a href="https://www.encodeproject.org/files/ENCFF182SEJ/@/download/ENCFF182SEJ.bed.gz">https://www.encodeproject.org/files/ENCFF182SEJ/@/download/ENCFF182SEJ.bed.gz</a> |
| ENCFF505YPT | ENCSR163KRG | <a href="https://www.encodeproject.org/files/ENCFF505YPT/@/download/ENCFF505YPT.bed.gz">https://www.encodeproject.org/files/ENCFF505YPT/@/download/ENCFF505YPT.bed.gz</a> |
| ENCFF551EAY | ENCSR637MUF | <a href="https://www.encodeproject.org/files/ENCFF551EAY/@/download/ENCFF551EAY.bed.gz">https://www.encodeproject.org/files/ENCFF551EAY/@/download/ENCFF551EAY.bed.gz</a> |
| ENCFF550WFX | ENCSR635AIF | <a href="https://www.encodeproject.org/files/ENCFF550WFX/@/download/ENCFF550WFX.bed.gz">https://www.encodeproject.org/files/ENCFF550WFX/@/download/ENCFF550WFX.bed.gz</a> |
| ENCFF252MOE | ENCSR594TMY | <a href="https://www.encodeproject.org/files/ENCFF252MOE/@/download/ENCFF252MOE.bed.gz">https://www.encodeproject.org/files/ENCFF252MOE/@/download/ENCFF252MOE.bed.gz</a> |
| ENCFF810XER | ENCSR040PBN | <a href="https://www.encodeproject.org/files/ENCFF810XER/@/download/ENCFF810XER.bed.gz">https://www.encodeproject.org/files/ENCFF810XER/@/download/ENCFF810XER.bed.gz</a> |
| ENCFF471QJG | ENCSR833ACP | <a href="https://www.encodeproject.org/files/ENCFF471QJG/@/download/ENCFF471QJG.bed.gz">https://www.encodeproject.org/files/ENCFF471QJG/@/download/ENCFF471QJG.bed.gz</a> |
| ENCFF246XGY | ENCSR000RBT | <a href="https://www.encodeproject.org/files/ENCFF246XGY/@/download/ENCFF246XGY.bed.gz">https://www.encodeproject.org/files/ENCFF246XGY/@/download/ENCFF246XGY.bed.gz</a> |
| ENCFF508EYC | ENCSR528YDD | <a href="https://www.encodeproject.org/files/ENCFF508EYC/@/download/ENCFF508EYC.bed.gz">https://www.encodeproject.org/files/ENCFF508EYC/@/download/ENCFF508EYC.bed.gz</a> |
| ENCFF176CKB | ENCSR231BZU | <a href="https://www.encodeproject.org/files/ENCFF176CKB/@/download/ENCFF176CKB.bed.gz">https://www.encodeproject.org/files/ENCFF176CKB/@/download/ENCFF176CKB.bed.gz</a> |
| ENCFF209RWV | ENCSR024WOD | <a href="https://www.encodeproject.org/files/ENCFF209RWV/@/download/ENCFF209RWV.bed.gz">https://www.encodeproject.org/files/ENCFF209RWV/@/download/ENCFF209RWV.bed.gz</a> |
| ENCFF715VOA | ENCSR524CPZ | <a href="https://www.encodeproject.org/files/ENCFF715VOA/@/download/ENCFF715VOA.bed.gz">https://www.encodeproject.org/files/ENCFF715VOA/@/download/ENCFF715VOA.bed.gz</a> |
| ENCFF468CHZ | ENCSR470ZNM | <a href="https://www.encodeproject.org/files/ENCFF468CHZ/@/download/ENCFF468CHZ.bed.gz">https://www.encodeproject.org/files/ENCFF468CHZ/@/download/ENCFF468CHZ.bed.gz</a> |
| ENCFF594MCK | ENCSR924SDV | <a href="https://www.encodeproject.org/files/ENCFF594MCK/@/download/ENCFF594MCK.bed.gz">https://www.encodeproject.org/files/ENCFF594MCK/@/download/ENCFF594MCK.bed.gz</a> |
| ENCFF610BYY | ENCSR628PLS | <a href="https://www.encodeproject.org/files/ENCFF610BYY/@/download/ENCFF610BYY.bed.gz">https://www.encodeproject.org/files/ENCFF610BYY/@/download/ENCFF610BYY.bed.gz</a> |
| ENCFF129JFU | ENCSR233HSC | <a href="https://www.encodeproject.org/files/ENCFF129JFU/@/download/ENCFF129JFU.bed.gz">https://www.encodeproject.org/files/ENCFF129JFU/@/download/ENCFF129JFU.bed.gz</a> |
| ENCFF197NOP | ENCSR425WQW | <a href="https://www.encodeproject.org/files/ENCFF197NOP/@/download/ENCFF197NOP.bed.gz">https://www.encodeproject.org/files/ENCFF197NOP/@/download/ENCFF197NOP.bed.gz</a> |
| ENCFF437HEK | ENCSR821QHC | <a href="https://www.encodeproject.org/files/ENCFF437HEK/@/download/ENCFF437HEK.bed.gz">https://www.encodeproject.org/files/ENCFF437HEK/@/download/ENCFF437HEK.bed.gz</a> |
| ENCFF138FQA | ENCSR335JVB | <a href="https://www.encodeproject.org/files/ENCFF138FQA/@/download/ENCFF138FQA.bed.gz">https://www.encodeproject.org/files/ENCFF138FQA/@/download/ENCFF138FQA.bed.gz</a> |
| ENCFF876LVG | ENCSR960KGO | <a href="https://www.encodeproject.org/files/ENCFF876LVG/@/download/ENCFF876LVG.bed.gz">https://www.encodeproject.org/files/ENCFF876LVG/@/download/ENCFF876LVG.bed.gz</a> |

|             |             |                                                                                                                                                                         |
|-------------|-------------|-------------------------------------------------------------------------------------------------------------------------------------------------------------------------|
| ENCFF344XDS | ENCSR917WJS | <a href="https://www.encodeproject.org/files/ENCFF344XDS/@download/ENCFF344XDS.bed.gz">https://www.encodeproject.org/files/ENCFF344XDS/@download/ENCFF344XDS.bed.gz</a> |
| ENCFF340FLI | ENCSR854ZBA | <a href="https://www.encodeproject.org/files/ENCFF340FLI/@download/ENCFF340FLI.bed.gz">https://www.encodeproject.org/files/ENCFF340FLI/@download/ENCFF340FLI.bed.gz</a> |
| ENCFF452XUT | ENCSR700HPA | <a href="https://www.encodeproject.org/files/ENCFF452XUT/@download/ENCFF452XUT.bed.gz">https://www.encodeproject.org/files/ENCFF452XUT/@download/ENCFF452XUT.bed.gz</a> |
| ENCFF002SXG | ENCSR134OSR | <a href="https://www.encodeproject.org/files/ENCFF002SXG/@download/ENCFF002SXG.bed.gz">https://www.encodeproject.org/files/ENCFF002SXG/@download/ENCFF002SXG.bed.gz</a> |
| ENCFF844BQZ | ENCSR424KQH | <a href="https://www.encodeproject.org/files/ENCFF844BQZ/@download/ENCFF844BQZ.bed.gz">https://www.encodeproject.org/files/ENCFF844BQZ/@download/ENCFF844BQZ.bed.gz</a> |
| ENCFF918IOX | ENCSR123WME | <a href="https://www.encodeproject.org/files/ENCFF918IOX/@download/ENCFF918IOX.bed.gz">https://www.encodeproject.org/files/ENCFF918IOX/@download/ENCFF918IOX.bed.gz</a> |
| ENCFF762FXN | ENCSR096VEO | <a href="https://www.encodeproject.org/files/ENCFF762FXN/@download/ENCFF762FXN.bed.gz">https://www.encodeproject.org/files/ENCFF762FXN/@download/ENCFF762FXN.bed.gz</a> |
| ENCFF682ZZT | ENCSR359HFH | <a href="https://www.encodeproject.org/files/ENCFF682ZZT/@download/ENCFF682ZZT.bed.gz">https://www.encodeproject.org/files/ENCFF682ZZT/@download/ENCFF682ZZT.bed.gz</a> |
| ENCFF756WUH | ENCSR821JHD | <a href="https://www.encodeproject.org/files/ENCFF756WUH/@download/ENCFF756WUH.bed.gz">https://www.encodeproject.org/files/ENCFF756WUH/@download/ENCFF756WUH.bed.gz</a> |
| ENCFF107CMG | ENCSR376YMU | <a href="https://www.encodeproject.org/files/ENCFF107CMG/@download/ENCFF107CMG.bed.gz">https://www.encodeproject.org/files/ENCFF107CMG/@download/ENCFF107CMG.bed.gz</a> |
| ENCFF733DJY | ENCSR084FHK | <a href="https://www.encodeproject.org/files/ENCFF733DJY/@download/ENCFF733DJY.bed.gz">https://www.encodeproject.org/files/ENCFF733DJY/@download/ENCFF733DJY.bed.gz</a> |
| ENCFF937GVS | ENCSR305XRF | <a href="https://www.encodeproject.org/files/ENCFF937GVS/@download/ENCFF937GVS.bed.gz">https://www.encodeproject.org/files/ENCFF937GVS/@download/ENCFF937GVS.bed.gz</a> |
| ENCFF093GBP | ENCSR635CAC | <a href="https://www.encodeproject.org/files/ENCFF093GBP/@download/ENCFF093GBP.bed.gz">https://www.encodeproject.org/files/ENCFF093GBP/@download/ENCFF093GBP.bed.gz</a> |
| ENCFF339RRA | ENCSR920FQJ | <a href="https://www.encodeproject.org/files/ENCFF339RRA/@download/ENCFF339RRA.bed.gz">https://www.encodeproject.org/files/ENCFF339RRA/@download/ENCFF339RRA.bed.gz</a> |
| ENCFF694FCS | ENCSR762YFD | <a href="https://www.encodeproject.org/files/ENCFF694FCS/@download/ENCFF694FCS.bed.gz">https://www.encodeproject.org/files/ENCFF694FCS/@download/ENCFF694FCS.bed.gz</a> |
| ENCFF061UDU | ENCSR275LCF | <a href="https://www.encodeproject.org/files/ENCFF061UDU/@download/ENCFF061UDU.bed.gz">https://www.encodeproject.org/files/ENCFF061UDU/@download/ENCFF061UDU.bed.gz</a> |
| ENCFF703AAZ | ENCSR422RPD | <a href="https://www.encodeproject.org/files/ENCFF703AAZ/@download/ENCFF703AAZ.bed.gz">https://www.encodeproject.org/files/ENCFF703AAZ/@download/ENCFF703AAZ.bed.gz</a> |
| ENCFF262DJL | ENCSR208HAP | <a href="https://www.encodeproject.org/files/ENCFF262DJL/@download/ENCFF262DJL.bed.gz">https://www.encodeproject.org/files/ENCFF262DJL/@download/ENCFF262DJL.bed.gz</a> |
| ENCFF278HDB | ENCSR011NJP | <a href="https://www.encodeproject.org/files/ENCFF278HDB/@download/ENCFF278HDB.bed.gz">https://www.encodeproject.org/files/ENCFF278HDB/@download/ENCFF278HDB.bed.gz</a> |
| ENCFF966KNT | ENCSR487QSB | <a href="https://www.encodeproject.org/files/ENCFF966KNT/@download/ENCFF966KNT.bed.gz">https://www.encodeproject.org/files/ENCFF966KNT/@download/ENCFF966KNT.bed.gz</a> |
| ENCFF367ROZ | ENCSR038WVV | <a href="https://www.encodeproject.org/files/ENCFF367ROZ/@download/ENCFF367ROZ.bed.gz">https://www.encodeproject.org/files/ENCFF367ROZ/@download/ENCFF367ROZ.bed.gz</a> |
| ENCFF674XMD | ENCSR214EIV | <a href="https://www.encodeproject.org/files/ENCFF674XMD/@download/ENCFF674XMD.bed.gz">https://www.encodeproject.org/files/ENCFF674XMD/@download/ENCFF674XMD.bed.gz</a> |
| ENCFF085DFN | ENCSR357WQH | <a href="https://www.encodeproject.org/files/ENCFF085DFN/@download/ENCFF085DFN.bed.gz">https://www.encodeproject.org/files/ENCFF085DFN/@download/ENCFF085DFN.bed.gz</a> |
| ENCFF586OGP | ENCSR442OAV | <a href="https://www.encodeproject.org/files/ENCFF586OGP/@download/ENCFF586OGP.bed.gz">https://www.encodeproject.org/files/ENCFF586OGP/@download/ENCFF586OGP.bed.gz</a> |
| ENCFF557BSF | ENCSR304ZDQ | <a href="https://www.encodeproject.org/files/ENCFF557BSF/@download/ENCFF557BSF.bed.gz">https://www.encodeproject.org/files/ENCFF557BSF/@download/ENCFF557BSF.bed.gz</a> |
| ENCFF384IUM | ENCSR122NDR | <a href="https://www.encodeproject.org/files/ENCFF384IUM/@download/ENCFF384IUM.bed.gz">https://www.encodeproject.org/files/ENCFF384IUM/@download/ENCFF384IUM.bed.gz</a> |
| ENCFF464KLS | ENCSR404OEO | <a href="https://www.encodeproject.org/files/ENCFF464KLS/@download/ENCFF464KLS.bed.gz">https://www.encodeproject.org/files/ENCFF464KLS/@download/ENCFF464KLS.bed.gz</a> |
| ENCFF030FZS | ENCSR408IVU | <a href="https://www.encodeproject.org/files/ENCFF030FZS/@download/ENCFF030FZS.bed.gz">https://www.encodeproject.org/files/ENCFF030FZS/@download/ENCFF030FZS.bed.gz</a> |
| ENCFF256UDE | ENCSR857MCZ | <a href="https://www.encodeproject.org/files/ENCFF256UDE/@download/ENCFF256UDE.bed.gz">https://www.encodeproject.org/files/ENCFF256UDE/@download/ENCFF256UDE.bed.gz</a> |
| ENCFF948GVD | ENCSR835WBW | <a href="https://www.encodeproject.org/files/ENCFF948GVD/@download/ENCFF948GVD.bed.gz">https://www.encodeproject.org/files/ENCFF948GVD/@download/ENCFF948GVD.bed.gz</a> |
| ENCFF268EVB | ENCSR962ITF | <a href="https://www.encodeproject.org/files/ENCFF268EVB/@download/ENCFF268EVB.bed.gz">https://www.encodeproject.org/files/ENCFF268EVB/@download/ENCFF268EVB.bed.gz</a> |

|             |             |                                                                                                                                                                           |
|-------------|-------------|---------------------------------------------------------------------------------------------------------------------------------------------------------------------------|
| ENCFF695HXA | ENCSR253QLW | <a href="https://www.encodeproject.org/files/ENCFF695HXA/@/download/ENCFF695HXA.bed.gz">https://www.encodeproject.org/files/ENCFF695HXA/@/download/ENCFF695HXA.bed.gz</a> |
| ENCFF538YUQ | ENCSR492FJO | <a href="https://www.encodeproject.org/files/ENCFF538YUQ/@/download/ENCFF538YUQ.bed.gz">https://www.encodeproject.org/files/ENCFF538YUQ/@/download/ENCFF538YUQ.bed.gz</a> |
| ENCFF451ZYJ | ENCSR858GTE | <a href="https://www.encodeproject.org/files/ENCFF451ZYJ/@/download/ENCFF451ZYJ.bed.gz">https://www.encodeproject.org/files/ENCFF451ZYJ/@/download/ENCFF451ZYJ.bed.gz</a> |
| ENCFF619LDY | ENCSR322SBN | <a href="https://www.encodeproject.org/files/ENCFF619LDY/@/download/ENCFF619LDY.bed.gz">https://www.encodeproject.org/files/ENCFF619LDY/@/download/ENCFF619LDY.bed.gz</a> |
| ENCFF356XWJ | ENCSR621JYI | <a href="https://www.encodeproject.org/files/ENCFF356XWJ/@/download/ENCFF356XWJ.bed.gz">https://www.encodeproject.org/files/ENCFF356XWJ/@/download/ENCFF356XWJ.bed.gz</a> |
| ENCFF423TQD | ENCSR512FHU | <a href="https://www.encodeproject.org/files/ENCFF423TQD/@/download/ENCFF423TQD.bed.gz">https://www.encodeproject.org/files/ENCFF423TQD/@/download/ENCFF423TQD.bed.gz</a> |
| ENCFF597KPI | ENCSR839IAD | <a href="https://www.encodeproject.org/files/ENCFF597KPI/@/download/ENCFF597KPI.bed.gz">https://www.encodeproject.org/files/ENCFF597KPI/@/download/ENCFF597KPI.bed.gz</a> |
| ENCFF184NOC | ENCSR509JPT | <a href="https://www.encodeproject.org/files/ENCFF184NOC/@/download/ENCFF184NOC.bed.gz">https://www.encodeproject.org/files/ENCFF184NOC/@/download/ENCFF184NOC.bed.gz</a> |
| ENCFF390QUM | ENCSR487SOP | <a href="https://www.encodeproject.org/files/ENCFF390QUM/@/download/ENCFF390QUM.bed.gz">https://www.encodeproject.org/files/ENCFF390QUM/@/download/ENCFF390QUM.bed.gz</a> |
| ENCFF926ULQ | ENCSR706GDQ | <a href="https://www.encodeproject.org/files/ENCFF926ULQ/@/download/ENCFF926ULQ.bed.gz">https://www.encodeproject.org/files/ENCFF926ULQ/@/download/ENCFF926ULQ.bed.gz</a> |
| ENCFF697QXK | ENCSR144ZXR | <a href="https://www.encodeproject.org/files/ENCFF697QXK/@/download/ENCFF697QXK.bed.gz">https://www.encodeproject.org/files/ENCFF697QXK/@/download/ENCFF697QXK.bed.gz</a> |
| ENCFF003NCK | ENCSR409YCK | <a href="https://www.encodeproject.org/files/ENCFF003NCK/@/download/ENCFF003NCK.bed.gz">https://www.encodeproject.org/files/ENCFF003NCK/@/download/ENCFF003NCK.bed.gz</a> |
| ENCFF611XGS | ENCSR454UTH | <a href="https://www.encodeproject.org/files/ENCFF611XGS/@/download/ENCFF611XGS.bed.gz">https://www.encodeproject.org/files/ENCFF611XGS/@/download/ENCFF611XGS.bed.gz</a> |
| ENCFF962LEY | ENCSR063UNG | <a href="https://www.encodeproject.org/files/ENCFF962LEY/@/download/ENCFF962LEY.bed.gz">https://www.encodeproject.org/files/ENCFF962LEY/@/download/ENCFF962LEY.bed.gz</a> |
| ENCFF598EDX | ENCSR624CTU | <a href="https://www.encodeproject.org/files/ENCFF598EDX/@/download/ENCFF598EDX.bed.gz">https://www.encodeproject.org/files/ENCFF598EDX/@/download/ENCFF598EDX.bed.gz</a> |
| ENCFF007OSO | ENCSR345NVR | <a href="https://www.encodeproject.org/files/ENCFF007OSO/@/download/ENCFF007OSO.bed.gz">https://www.encodeproject.org/files/ENCFF007OSO/@/download/ENCFF007OSO.bed.gz</a> |
| ENCFF900WSD | ENCSR902CFR | <a href="https://www.encodeproject.org/files/ENCFF900WSD/@/download/ENCFF900WSD.bed.gz">https://www.encodeproject.org/files/ENCFF900WSD/@/download/ENCFF900WSD.bed.gz</a> |
| ENCFF072JKR | ENCSR241VGH | <a href="https://www.encodeproject.org/files/ENCFF072JKR/@/download/ENCFF072JKR.bed.gz">https://www.encodeproject.org/files/ENCFF072JKR/@/download/ENCFF072JKR.bed.gz</a> |
| ENCFF027KMZ | ENCSR331JFZ | <a href="https://www.encodeproject.org/files/ENCFF027KMZ/@/download/ENCFF027KMZ.bed.gz">https://www.encodeproject.org/files/ENCFF027KMZ/@/download/ENCFF027KMZ.bed.gz</a> |
| ENCFF915GOP | ENCSR580JBA | <a href="https://www.encodeproject.org/files/ENCFF915GOP/@/download/ENCFF915GOP.bed.gz">https://www.encodeproject.org/files/ENCFF915GOP/@/download/ENCFF915GOP.bed.gz</a> |
| ENCFF828UQL | ENCSR641KNU | <a href="https://www.encodeproject.org/files/ENCFF828UQL/@/download/ENCFF828UQL.bed.gz">https://www.encodeproject.org/files/ENCFF828UQL/@/download/ENCFF828UQL.bed.gz</a> |
| ENCFF228KGP | ENCSR553LAZ | <a href="https://www.encodeproject.org/files/ENCFF228KGP/@/download/ENCFF228KGP.bed.gz">https://www.encodeproject.org/files/ENCFF228KGP/@/download/ENCFF228KGP.bed.gz</a> |
| ENCFF316GRQ | ENCSR775SYU | <a href="https://www.encodeproject.org/files/ENCFF316GRQ/@/download/ENCFF316GRQ.bed.gz">https://www.encodeproject.org/files/ENCFF316GRQ/@/download/ENCFF316GRQ.bed.gz</a> |
| ENCFF245FHK | ENCSR344ZTM | <a href="https://www.encodeproject.org/files/ENCFF245FHK/@/download/ENCFF245FHK.bed.gz">https://www.encodeproject.org/files/ENCFF245FHK/@/download/ENCFF245FHK.bed.gz</a> |
| ENCFF940NBD | ENCSR685ZMP | <a href="https://www.encodeproject.org/files/ENCFF940NBD/@/download/ENCFF940NBD.bed.gz">https://www.encodeproject.org/files/ENCFF940NBD/@/download/ENCFF940NBD.bed.gz</a> |
| ENCFF423RGJ | ENCSR356KRQ | <a href="https://www.encodeproject.org/files/ENCFF423RGJ/@/download/ENCFF423RGJ.bed.gz">https://www.encodeproject.org/files/ENCFF423RGJ/@/download/ENCFF423RGJ.bed.gz</a> |
| ENCFF768TYT | ENCSR356KRQ | <a href="https://www.encodeproject.org/files/ENCFF768TYT/@/download/ENCFF768TYT.bed.gz">https://www.encodeproject.org/files/ENCFF768TYT/@/download/ENCFF768TYT.bed.gz</a> |
| ENCFF236BWF | ENCSR356KRQ | <a href="https://www.encodeproject.org/files/ENCFF236BWF/@/download/ENCFF236BWF.bed.gz">https://www.encodeproject.org/files/ENCFF236BWF/@/download/ENCFF236BWF.bed.gz</a> |
| ENCFF287WFV | ENCSR356KRQ | <a href="https://www.encodeproject.org/files/ENCFF287WFV/@/download/ENCFF287WFV.bed.gz">https://www.encodeproject.org/files/ENCFF287WFV/@/download/ENCFF287WFV.bed.gz</a> |
| ENCFF616CHX | ENCSR552QUA | <a href="https://www.encodeproject.org/files/ENCFF616CHX/@/download/ENCFF616CHX.bed.gz">https://www.encodeproject.org/files/ENCFF616CHX/@/download/ENCFF616CHX.bed.gz</a> |
| ENCFF767OIB | ENCSR990NNX | <a href="https://www.encodeproject.org/files/ENCFF767OIB/@/download/ENCFF767OIB.bed.gz">https://www.encodeproject.org/files/ENCFF767OIB/@/download/ENCFF767OIB.bed.gz</a> |

|             |             |                                                                                                                                                                           |
|-------------|-------------|---------------------------------------------------------------------------------------------------------------------------------------------------------------------------|
| ENCFF324QLD | ENCSR496PPU | <a href="https://www.encodeproject.org/files/ENCFF324QLD/@/download/ENCFF324QLD.bed.gz">https://www.encodeproject.org/files/ENCFF324QLD/@/download/ENCFF324QLD.bed.gz</a> |
| ENCFF483FWG | ENCSR836FIL | <a href="https://www.encodeproject.org/files/ENCFF483FWG/@/download/ENCFF483FWG.bed.gz">https://www.encodeproject.org/files/ENCFF483FWG/@/download/ENCFF483FWG.bed.gz</a> |
| ENCFF820DKN | ENCSR452OSK | <a href="https://www.encodeproject.org/files/ENCFF820DKN/@/download/ENCFF820DKN.bed.gz">https://www.encodeproject.org/files/ENCFF820DKN/@/download/ENCFF820DKN.bed.gz</a> |
| ENCFF976AWF | ENCSR624ODL | <a href="https://www.encodeproject.org/files/ENCFF976AWF/@/download/ENCFF976AWF.bed.gz">https://www.encodeproject.org/files/ENCFF976AWF/@/download/ENCFF976AWF.bed.gz</a> |
| ENCFF695NDC | ENCSR133WJY | <a href="https://www.encodeproject.org/files/ENCFF695NDC/@/download/ENCFF695NDC.bed.gz">https://www.encodeproject.org/files/ENCFF695NDC/@/download/ENCFF695NDC.bed.gz</a> |
| ENCFF829YTT | ENCSR251POP | <a href="https://www.encodeproject.org/files/ENCFF829YTT/@/download/ENCFF829YTT.bed.gz">https://www.encodeproject.org/files/ENCFF829YTT/@/download/ENCFF829YTT.bed.gz</a> |
| ENCFF776LMY | ENCSR474XFV | <a href="https://www.encodeproject.org/files/ENCFF776LMY/@/download/ENCFF776LMY.bed.gz">https://www.encodeproject.org/files/ENCFF776LMY/@/download/ENCFF776LMY.bed.gz</a> |
| ENCFF365RAW | ENCSR474XFV | <a href="https://www.encodeproject.org/files/ENCFF365RAW/@/download/ENCFF365RAW.bed.gz">https://www.encodeproject.org/files/ENCFF365RAW/@/download/ENCFF365RAW.bed.gz</a> |
| ENCFF826MFY | ENCSR414DVK | <a href="https://www.encodeproject.org/files/ENCFF826MFY/@/download/ENCFF826MFY.bed.gz">https://www.encodeproject.org/files/ENCFF826MFY/@/download/ENCFF826MFY.bed.gz</a> |
| ENCFF663KQH | ENCSR414DVK | <a href="https://www.encodeproject.org/files/ENCFF663KQH/@/download/ENCFF663KQH.bed.gz">https://www.encodeproject.org/files/ENCFF663KQH/@/download/ENCFF663KQH.bed.gz</a> |
| ENCFF410GKB | ENCSR668VCT | <a href="https://www.encodeproject.org/files/ENCFF410GKB/@/download/ENCFF410GKB.bed.gz">https://www.encodeproject.org/files/ENCFF410GKB/@/download/ENCFF410GKB.bed.gz</a> |
| ENCFF251CFX | ENCSR668VCT | <a href="https://www.encodeproject.org/files/ENCFF251CFX/@/download/ENCFF251CFX.bed.gz">https://www.encodeproject.org/files/ENCFF251CFX/@/download/ENCFF251CFX.bed.gz</a> |
| ENCFF541ZHB | ENCSR355SGJ | <a href="https://www.encodeproject.org/files/ENCFF541ZHB/@/download/ENCFF541ZHB.bed.gz">https://www.encodeproject.org/files/ENCFF541ZHB/@/download/ENCFF541ZHB.bed.gz</a> |
| ENCFF323ALI | ENCSR355SGJ | <a href="https://www.encodeproject.org/files/ENCFF323ALI/@/download/ENCFF323ALI.bed.gz">https://www.encodeproject.org/files/ENCFF323ALI/@/download/ENCFF323ALI.bed.gz</a> |
| ENCFF117MSK | ENCSR483RKN | <a href="https://www.encodeproject.org/files/ENCFF117MSK/@/download/ENCFF117MSK.bed.gz">https://www.encodeproject.org/files/ENCFF117MSK/@/download/ENCFF117MSK.bed.gz</a> |
| ENCFF695IGF | ENCSR483RKN | <a href="https://www.encodeproject.org/files/ENCFF695IGF/@/download/ENCFF695IGF.bed.gz">https://www.encodeproject.org/files/ENCFF695IGF/@/download/ENCFF695IGF.bed.gz</a> |
| ENCFF976CEI | ENCSR483RKN | <a href="https://www.encodeproject.org/files/ENCFF976CEI/@/download/ENCFF976CEI.bed.gz">https://www.encodeproject.org/files/ENCFF976CEI/@/download/ENCFF976CEI.bed.gz</a> |
| ENCFF925CYR | ENCSR483RKN | <a href="https://www.encodeproject.org/files/ENCFF925CYR/@/download/ENCFF925CYR.bed.gz">https://www.encodeproject.org/files/ENCFF925CYR/@/download/ENCFF925CYR.bed.gz</a> |
| ENCFF932OLP | ENCSR392UJM | <a href="https://www.encodeproject.org/files/ENCFF932OLP/@/download/ENCFF932OLP.bed.gz">https://www.encodeproject.org/files/ENCFF932OLP/@/download/ENCFF932OLP.bed.gz</a> |
| ENCFF389WIM | ENCSR886VCC | <a href="https://www.encodeproject.org/files/ENCFF389WIM/@/download/ENCFF389WIM.bed.gz">https://www.encodeproject.org/files/ENCFF389WIM/@/download/ENCFF389WIM.bed.gz</a> |
| ENCFF800IWT | ENCSR886VCC | <a href="https://www.encodeproject.org/files/ENCFF800IWT/@/download/ENCFF800IWT.bed.gz">https://www.encodeproject.org/files/ENCFF800IWT/@/download/ENCFF800IWT.bed.gz</a> |
| ENCFF105YML | ENCSR113MBR | <a href="https://www.encodeproject.org/files/ENCFF105YML/@/download/ENCFF105YML.bed.gz">https://www.encodeproject.org/files/ENCFF105YML/@/download/ENCFF105YML.bed.gz</a> |
| ENCFF460SWB | ENCSR113MBR | <a href="https://www.encodeproject.org/files/ENCFF460SWB/@/download/ENCFF460SWB.bed.gz">https://www.encodeproject.org/files/ENCFF460SWB/@/download/ENCFF460SWB.bed.gz</a> |
| ENCFF948OYI | ENCSR120MOY | <a href="https://www.encodeproject.org/files/ENCFF948OYI/@/download/ENCFF948OYI.bed.gz">https://www.encodeproject.org/files/ENCFF948OYI/@/download/ENCFF948OYI.bed.gz</a> |
| ENCFF168ASJ | ENCSR120MOY | <a href="https://www.encodeproject.org/files/ENCFF168ASJ/@/download/ENCFF168ASJ.bed.gz">https://www.encodeproject.org/files/ENCFF168ASJ/@/download/ENCFF168ASJ.bed.gz</a> |
| ENCFF384SZZ | ENCSR890DWH | <a href="https://www.encodeproject.org/files/ENCFF384SZZ/@/download/ENCFF384SZZ.bed.gz">https://www.encodeproject.org/files/ENCFF384SZZ/@/download/ENCFF384SZZ.bed.gz</a> |
| ENCFF775KEG | ENCSR890DWH | <a href="https://www.encodeproject.org/files/ENCFF775KEG/@/download/ENCFF775KEG.bed.gz">https://www.encodeproject.org/files/ENCFF775KEG/@/download/ENCFF775KEG.bed.gz</a> |
| ENCFF682IJY | ENCSR952SPO | <a href="https://www.encodeproject.org/files/ENCFF682IJY/@/download/ENCFF682IJY.bed.gz">https://www.encodeproject.org/files/ENCFF682IJY/@/download/ENCFF682IJY.bed.gz</a> |
| ENCFF981WQJ | ENCSR530XBF | <a href="https://www.encodeproject.org/files/ENCFF981WQJ/@/download/ENCFF981WQJ.bed.gz">https://www.encodeproject.org/files/ENCFF981WQJ/@/download/ENCFF981WQJ.bed.gz</a> |
| ENCFF122OHC | ENCSR399OSE | <a href="https://www.encodeproject.org/files/ENCFF122OHC/@/download/ENCFF122OHC.bed.gz">https://www.encodeproject.org/files/ENCFF122OHC/@/download/ENCFF122OHC.bed.gz</a> |
| ENCFF718BTP | ENCSR399OSE | <a href="https://www.encodeproject.org/files/ENCFF718BTP/@/download/ENCFF718BTP.bed.gz">https://www.encodeproject.org/files/ENCFF718BTP/@/download/ENCFF718BTP.bed.gz</a> |

|             |             |                                                                                                                                                                           |
|-------------|-------------|---------------------------------------------------------------------------------------------------------------------------------------------------------------------------|
| ENCFF859RAO | ENCSR731ODJ | <a href="https://www.encodeproject.org/files/ENCFF859RAO/@/download/ENCFF859RAO.bed.gz">https://www.encodeproject.org/files/ENCFF859RAO/@/download/ENCFF859RAO.bed.gz</a> |
| ENCFF991MKU | ENCSR731ODJ | <a href="https://www.encodeproject.org/files/ENCFF991MKU/@/download/ENCFF991MKU.bed.gz">https://www.encodeproject.org/files/ENCFF991MKU/@/download/ENCFF991MKU.bed.gz</a> |
| ENCFF647AGG | ENCSR872GW  | <a href="https://www.encodeproject.org/files/ENCFF647AGG/@/download/ENCFF647AGG.bed.gz">https://www.encodeproject.org/files/ENCFF647AGG/@/download/ENCFF647AGG.bed.gz</a> |
| ENCFF429LWF | ENCSR872GW  | <a href="https://www.encodeproject.org/files/ENCFF429LWF/@/download/ENCFF429LWF.bed.gz">https://www.encodeproject.org/files/ENCFF429LWF/@/download/ENCFF429LWF.bed.gz</a> |
| ENCFF054UBO | ENCSR872GW  | <a href="https://www.encodeproject.org/files/ENCFF054UBO/@/download/ENCFF054UBO.bed.gz">https://www.encodeproject.org/files/ENCFF054UBO/@/download/ENCFF054UBO.bed.gz</a> |
| ENCFF070LSQ | ENCSR872GW  | <a href="https://www.encodeproject.org/files/ENCFF070LSQ/@/download/ENCFF070LSQ.bed.gz">https://www.encodeproject.org/files/ENCFF070LSQ/@/download/ENCFF070LSQ.bed.gz</a> |
| ENCFF986AJX | ENCSR855BMI | <a href="https://www.encodeproject.org/files/ENCFF986AJX/@/download/ENCFF986AJX.bed.gz">https://www.encodeproject.org/files/ENCFF986AJX/@/download/ENCFF986AJX.bed.gz</a> |
| ENCFF363FTI | ENCSR855BMI | <a href="https://www.encodeproject.org/files/ENCFF363FTI/@/download/ENCFF363FTI.bed.gz">https://www.encodeproject.org/files/ENCFF363FTI/@/download/ENCFF363FTI.bed.gz</a> |
| ENCFF009FWX | ENCSR212LYK | <a href="https://www.encodeproject.org/files/ENCFF009FWX/@/download/ENCFF009FWX.bed.gz">https://www.encodeproject.org/files/ENCFF009FWX/@/download/ENCFF009FWX.bed.gz</a> |
| ENCFF968YWL | ENCSR212LYK | <a href="https://www.encodeproject.org/files/ENCFF968YWL/@/download/ENCFF968YWL.bed.gz">https://www.encodeproject.org/files/ENCFF968YWL/@/download/ENCFF968YWL.bed.gz</a> |
| ENCFF643QLU | ENCSR439TZZ | <a href="https://www.encodeproject.org/files/ENCFF643QLU/@/download/ENCFF643QLU.bed.gz">https://www.encodeproject.org/files/ENCFF643QLU/@/download/ENCFF643QLU.bed.gz</a> |
| ENCFF645EFP | ENCSR925LGW | <a href="https://www.encodeproject.org/files/ENCFF645EFP/@/download/ENCFF645EFP.bed.gz">https://www.encodeproject.org/files/ENCFF645EFP/@/download/ENCFF645EFP.bed.gz</a> |
| ENCFF984UBD | ENCSR925LGW | <a href="https://www.encodeproject.org/files/ENCFF984UBD/@/download/ENCFF984UBD.bed.gz">https://www.encodeproject.org/files/ENCFF984UBD/@/download/ENCFF984UBD.bed.gz</a> |
| ENCFF901IVP | ENCSR609GST | <a href="https://www.encodeproject.org/files/ENCFF901IVP/@/download/ENCFF901IVP.bed.gz">https://www.encodeproject.org/files/ENCFF901IVP/@/download/ENCFF901IVP.bed.gz</a> |
| ENCFF272UWG | ENCSR609GST | <a href="https://www.encodeproject.org/files/ENCFF272UWG/@/download/ENCFF272UWG.bed.gz">https://www.encodeproject.org/files/ENCFF272UWG/@/download/ENCFF272UWG.bed.gz</a> |
| ENCFF072OBU | ENCSR548KIL | <a href="https://www.encodeproject.org/files/ENCFF072OBU/@/download/ENCFF072OBU.bed.gz">https://www.encodeproject.org/files/ENCFF072OBU/@/download/ENCFF072OBU.bed.gz</a> |
| ENCFF511DPE | ENCSR548KIL | <a href="https://www.encodeproject.org/files/ENCFF511DPE/@/download/ENCFF511DPE.bed.gz">https://www.encodeproject.org/files/ENCFF511DPE/@/download/ENCFF511DPE.bed.gz</a> |
| ENCFF834ZVG | ENCSR227FVE | <a href="https://www.encodeproject.org/files/ENCFF834ZVG/@/download/ENCFF834ZVG.bed.gz">https://www.encodeproject.org/files/ENCFF834ZVG/@/download/ENCFF834ZVG.bed.gz</a> |
| ENCFF628CCO | ENCSR227FVE | <a href="https://www.encodeproject.org/files/ENCFF628CCO/@/download/ENCFF628CCO.bed.gz">https://www.encodeproject.org/files/ENCFF628CCO/@/download/ENCFF628CCO.bed.gz</a> |
| ENCFF440HSL | ENCSR086OGH | <a href="https://www.encodeproject.org/files/ENCFF440HSL/@/download/ENCFF440HSL.bed.gz">https://www.encodeproject.org/files/ENCFF440HSL/@/download/ENCFF440HSL.bed.gz</a> |
| ENCFF697MUB | ENCSR086OGH | <a href="https://www.encodeproject.org/files/ENCFF697MUB/@/download/ENCFF697MUB.bed.gz">https://www.encodeproject.org/files/ENCFF697MUB/@/download/ENCFF697MUB.bed.gz</a> |
| ENCFF129BFZ | ENCSR078EBD | <a href="https://www.encodeproject.org/files/ENCFF129BFZ/@/download/ENCFF129BFZ.bed.gz">https://www.encodeproject.org/files/ENCFF129BFZ/@/download/ENCFF129BFZ.bed.gz</a> |
| ENCFF105FRE | ENCSR078EBD | <a href="https://www.encodeproject.org/files/ENCFF105FRE/@/download/ENCFF105FRE.bed.gz">https://www.encodeproject.org/files/ENCFF105FRE/@/download/ENCFF105FRE.bed.gz</a> |
| ENCFF250CRB | ENCSR851EBF | <a href="https://www.encodeproject.org/files/ENCFF250CRB/@/download/ENCFF250CRB.bed.gz">https://www.encodeproject.org/files/ENCFF250CRB/@/download/ENCFF250CRB.bed.gz</a> |
| ENCFF560EBG | ENCSR851EBF | <a href="https://www.encodeproject.org/files/ENCFF560EBG/@/download/ENCFF560EBG.bed.gz">https://www.encodeproject.org/files/ENCFF560EBG/@/download/ENCFF560EBG.bed.gz</a> |
| ENCFF046YUJ | ENCSR999NKW | <a href="https://www.encodeproject.org/files/ENCFF046YUJ/@/download/ENCFF046YUJ.bed.gz">https://www.encodeproject.org/files/ENCFF046YUJ/@/download/ENCFF046YUJ.bed.gz</a> |
| ENCFF963ISM | ENCSR999NKW | <a href="https://www.encodeproject.org/files/ENCFF963ISM/@/download/ENCFF963ISM.bed.gz">https://www.encodeproject.org/files/ENCFF963ISM/@/download/ENCFF963ISM.bed.gz</a> |
| ENCFF271ROE | ENCSR555ZDH | <a href="https://www.encodeproject.org/files/ENCFF271ROE/@/download/ENCFF271ROE.bed.gz">https://www.encodeproject.org/files/ENCFF271ROE/@/download/ENCFF271ROE.bed.gz</a> |
| ENCFF232ELL | ENCSR177JWR | <a href="https://www.encodeproject.org/files/ENCFF232ELL/@/download/ENCFF232ELL.bed.gz">https://www.encodeproject.org/files/ENCFF232ELL/@/download/ENCFF232ELL.bed.gz</a> |
| ENCFF984UZN | ENCSR032RGS | <a href="https://www.encodeproject.org/files/ENCFF984UZN/@/download/ENCFF984UZN.bed.gz">https://www.encodeproject.org/files/ENCFF984UZN/@/download/ENCFF984UZN.bed.gz</a> |
| ENCFF127KOF | ENCSR032RGS | <a href="https://www.encodeproject.org/files/ENCFF127KOF/@/download/ENCFF127KOF.bed.gz">https://www.encodeproject.org/files/ENCFF127KOF/@/download/ENCFF127KOF.bed.gz</a> |



|             |             |                                                                                                                                                                           |
|-------------|-------------|---------------------------------------------------------------------------------------------------------------------------------------------------------------------------|
| ENCFF548PSN | ENCSR032RGS | <a href="https://www.encodeproject.org/files/ENCFF548PSN/@/download/ENCFF548PSN.bed.gz">https://www.encodeproject.org/files/ENCFF548PSN/@/download/ENCFF548PSN.bed.gz</a> |
| ENCFF063OBU | ENCSR032RGS | <a href="https://www.encodeproject.org/files/ENCFF063OBU/@/download/ENCFF063OBU.bed.gz">https://www.encodeproject.org/files/ENCFF063OBU/@/download/ENCFF063OBU.bed.gz</a> |
| ENCFF479TER | ENCSR032RGS | <a href="https://www.encodeproject.org/files/ENCFF479TER/@/download/ENCFF479TER.bed.gz">https://www.encodeproject.org/files/ENCFF479TER/@/download/ENCFF479TER.bed.gz</a> |
| ENCFF296VFY | ENCSR032RGS | <a href="https://www.encodeproject.org/files/ENCFF296VFY/@/download/ENCFF296VFY.bed.gz">https://www.encodeproject.org/files/ENCFF296VFY/@/download/ENCFF296VFY.bed.gz</a> |
| ENCFF069IWR | ENCSR032RGS | <a href="https://www.encodeproject.org/files/ENCFF069IWR/@/download/ENCFF069IWR.bed.gz">https://www.encodeproject.org/files/ENCFF069IWR/@/download/ENCFF069IWR.bed.gz</a> |
| ENCFF797FLV | ENCSR970UNF | <a href="https://www.encodeproject.org/files/ENCFF797FLV/@/download/ENCFF797FLV.bed.gz">https://www.encodeproject.org/files/ENCFF797FLV/@/download/ENCFF797FLV.bed.gz</a> |
| ENCFF249EQM | ENCSR970UNF | <a href="https://www.encodeproject.org/files/ENCFF249EQM/@/download/ENCFF249EQM.bed.gz">https://www.encodeproject.org/files/ENCFF249EQM/@/download/ENCFF249EQM.bed.gz</a> |
| ENCFF901IWE | ENCSR970UNF | <a href="https://www.encodeproject.org/files/ENCFF901IWE/@/download/ENCFF901IWE.bed.gz">https://www.encodeproject.org/files/ENCFF901IWE/@/download/ENCFF901IWE.bed.gz</a> |
| ENCFF159YDR | ENCSR970UNF | <a href="https://www.encodeproject.org/files/ENCFF159YDR/@/download/ENCFF159YDR.bed.gz">https://www.encodeproject.org/files/ENCFF159YDR/@/download/ENCFF159YDR.bed.gz</a> |
| ENCFF506RYJ | ENCSR310UDW | <a href="https://www.encodeproject.org/files/ENCFF506RYJ/@/download/ENCFF506RYJ.bed.gz">https://www.encodeproject.org/files/ENCFF506RYJ/@/download/ENCFF506RYJ.bed.gz</a> |
| ENCFF845KMK | ENCSR157OSO | <a href="https://www.encodeproject.org/files/ENCFF845KMK/@/download/ENCFF845KMK.bed.gz">https://www.encodeproject.org/files/ENCFF845KMK/@/download/ENCFF845KMK.bed.gz</a> |
| ENCFF257UAY | ENCSR157OSO | <a href="https://www.encodeproject.org/files/ENCFF257UAY/@/download/ENCFF257UAY.bed.gz">https://www.encodeproject.org/files/ENCFF257UAY/@/download/ENCFF257UAY.bed.gz</a> |
| ENCFF285BXB | ENCSR017RQC | <a href="https://www.encodeproject.org/files/ENCFF994AHG/@/download/ENCFF994AHG.bed.gz">https://www.encodeproject.org/files/ENCFF994AHG/@/download/ENCFF994AHG.bed.gz</a> |
| ENCFF374BNC | ENCSR017RQC | <a href="https://www.encodeproject.org/files/ENCFF956UCP/@/download/ENCFF956UCP.bed.gz">https://www.encodeproject.org/files/ENCFF956UCP/@/download/ENCFF956UCP.bed.gz</a> |
| ENCFF305AHS | ENCSR823ZCR | <a href="https://www.encodeproject.org/files/ENCFF305AHS/@/download/ENCFF305AHS.bed.gz">https://www.encodeproject.org/files/ENCFF305AHS/@/download/ENCFF305AHS.bed.gz</a> |
| ENCFF953QCT | ENCSR823ZCR | <a href="https://www.encodeproject.org/files/ENCFF953QCT/@/download/ENCFF953QCT.bed.gz">https://www.encodeproject.org/files/ENCFF953QCT/@/download/ENCFF953QCT.bed.gz</a> |
| ENCFF998WFC | ENCSR337UIU | <a href="https://www.encodeproject.org/files/ENCFF998WFC/@/download/ENCFF998WFC.bed.gz">https://www.encodeproject.org/files/ENCFF998WFC/@/download/ENCFF998WFC.bed.gz</a> |
| ENCFF244DRQ | ENCSR337UIU | <a href="https://www.encodeproject.org/files/ENCFF244DRQ/@/download/ENCFF244DRQ.bed.gz">https://www.encodeproject.org/files/ENCFF244DRQ/@/download/ENCFF244DRQ.bed.gz</a> |
| ENCFF466CVI | ENCSR499ASS | <a href="https://www.encodeproject.org/files/ENCFF466CVI/@/download/ENCFF466CVI.bed.gz">https://www.encodeproject.org/files/ENCFF466CVI/@/download/ENCFF466CVI.bed.gz</a> |
| ENCFF061YKV | ENCSR499ASS | <a href="https://www.encodeproject.org/files/ENCFF061YKV/@/download/ENCFF061YKV.bed.gz">https://www.encodeproject.org/files/ENCFF061YKV/@/download/ENCFF061YKV.bed.gz</a> |
| ENCFF742PNL | ENCSR499ASS | <a href="https://www.encodeproject.org/files/ENCFF742PNL/@/download/ENCFF742PNL.bed.gz">https://www.encodeproject.org/files/ENCFF742PNL/@/download/ENCFF742PNL.bed.gz</a> |
| ENCFF369VMF | ENCSR499ASS | <a href="https://www.encodeproject.org/files/ENCFF369VMF/@/download/ENCFF369VMF.bed.gz">https://www.encodeproject.org/files/ENCFF369VMF/@/download/ENCFF369VMF.bed.gz</a> |
| ENCFF224QAO | ENCSR695FLC | <a href="https://www.encodeproject.org/files/ENCFF224QAO/@/download/ENCFF224QAO.bed.gz">https://www.encodeproject.org/files/ENCFF224QAO/@/download/ENCFF224QAO.bed.gz</a> |
| ENCFF037ANG | ENCSR695FLC | <a href="https://www.encodeproject.org/files/ENCFF037ANG/@/download/ENCFF037ANG.bed.gz">https://www.encodeproject.org/files/ENCFF037ANG/@/download/ENCFF037ANG.bed.gz</a> |
| ENCFF544MQW | ENCSR591PIX | <a href="https://www.encodeproject.org/files/ENCFF544MQW/@/download/ENCFF544MQW.bed.gz">https://www.encodeproject.org/files/ENCFF544MQW/@/download/ENCFF544MQW.bed.gz</a> |
| ENCFF510OSH | ENCSR591PIX | <a href="https://www.encodeproject.org/files/ENCFF510OSH/@/download/ENCFF510OSH.bed.gz">https://www.encodeproject.org/files/ENCFF510OSH/@/download/ENCFF510OSH.bed.gz</a> |
| ENCFF481ELM | ENCSR591PIX | <a href="https://www.encodeproject.org/files/ENCFF481ELM/@/download/ENCFF481ELM.bed.gz">https://www.encodeproject.org/files/ENCFF481ELM/@/download/ENCFF481ELM.bed.gz</a> |
| ENCFF953NZY | ENCSR591PIX | <a href="https://www.encodeproject.org/files/ENCFF953NZY/@/download/ENCFF953NZY.bed.gz">https://www.encodeproject.org/files/ENCFF953NZY/@/download/ENCFF953NZY.bed.gz</a> |
| ENCFF188MZK | ENCSR600ZHS | <a href="https://www.encodeproject.org/files/ENCFF188MZK/@/download/ENCFF188MZK.bed.gz">https://www.encodeproject.org/files/ENCFF188MZK/@/download/ENCFF188MZK.bed.gz</a> |
| ENCFF993UXH | ENCSR600ZHS | <a href="https://www.encodeproject.org/files/ENCFF993UXH/@/download/ENCFF993UXH.bed.gz">https://www.encodeproject.org/files/ENCFF993UXH/@/download/ENCFF993UXH.bed.gz</a> |
| ENCFF138ISY | ENCSR682ETE | <a href="https://www.encodeproject.org/files/ENCFF138ISY/@/download/ENCFF138ISY.bed.gz">https://www.encodeproject.org/files/ENCFF138ISY/@/download/ENCFF138ISY.bed.gz</a> |

|             |             |                                                                                                                                                                           |
|-------------|-------------|---------------------------------------------------------------------------------------------------------------------------------------------------------------------------|
| ENCFF842EAT | ENCSR062SVK | <a href="https://www.encodeproject.org/files/ENCFF842EAT/@/download/ENCFF842EAT.bed.gz">https://www.encodeproject.org/files/ENCFF842EAT/@/download/ENCFF842EAT.bed.gz</a> |
| ENCFF675UHQ | ENCSR062SVK | <a href="https://www.encodeproject.org/files/ENCFF675UHQ/@/download/ENCFF675UHQ.bed.gz">https://www.encodeproject.org/files/ENCFF675UHQ/@/download/ENCFF675UHQ.bed.gz</a> |
| ENCFF524FYY | ENCSR490MSG | <a href="https://www.encodeproject.org/files/ENCFF524FYY/@/download/ENCFF524FYY.bed.gz">https://www.encodeproject.org/files/ENCFF524FYY/@/download/ENCFF524FYY.bed.gz</a> |
| ENCFF646EYO | ENCSR490MSG | <a href="https://www.encodeproject.org/files/ENCFF646EYO/@/download/ENCFF646EYO.bed.gz">https://www.encodeproject.org/files/ENCFF646EYO/@/download/ENCFF646EYO.bed.gz</a> |
| ENCFF563MKC | ENCSR548QCP | <a href="https://www.encodeproject.org/files/ENCFF563MKC/@/download/ENCFF563MKC.bed.gz">https://www.encodeproject.org/files/ENCFF563MKC/@/download/ENCFF563MKC.bed.gz</a> |
| ENCFF207QOW | ENCSR548QCP | <a href="https://www.encodeproject.org/files/ENCFF207QOW/@/download/ENCFF207QOW.bed.gz">https://www.encodeproject.org/files/ENCFF207QOW/@/download/ENCFF207QOW.bed.gz</a> |
| ENCFF929EDK | ENCSR204SMO | <a href="https://www.encodeproject.org/files/ENCFF929EDK/@/download/ENCFF929EDK.bed.gz">https://www.encodeproject.org/files/ENCFF929EDK/@/download/ENCFF929EDK.bed.gz</a> |
| ENCFF792EIF | ENCSR204SMO | <a href="https://www.encodeproject.org/files/ENCFF792EIF/@/download/ENCFF792EIF.bed.gz">https://www.encodeproject.org/files/ENCFF792EIF/@/download/ENCFF792EIF.bed.gz</a> |
| ENCFF421HWL | ENCSR542RNG | <a href="https://www.encodeproject.org/files/ENCFF421HWL/@/download/ENCFF421HWL.bed.gz">https://www.encodeproject.org/files/ENCFF421HWL/@/download/ENCFF421HWL.bed.gz</a> |
| ENCFF481MCI | ENCSR542RNG | <a href="https://www.encodeproject.org/files/ENCFF481MCI/@/download/ENCFF481MCI.bed.gz">https://www.encodeproject.org/files/ENCFF481MCI/@/download/ENCFF481MCI.bed.gz</a> |
| ENCFF613NGC | ENCSR303PWB | <a href="https://www.encodeproject.org/files/ENCFF613NGC/@/download/ENCFF613NGC.bed.gz">https://www.encodeproject.org/files/ENCFF613NGC/@/download/ENCFF613NGC.bed.gz</a> |
| ENCFF254OVS | ENCSR303PWB | <a href="https://www.encodeproject.org/files/ENCFF254OVS/@/download/ENCFF254OVS.bed.gz">https://www.encodeproject.org/files/ENCFF254OVS/@/download/ENCFF254OVS.bed.gz</a> |
| ENCFF620VTJ | ENCSR212LAZ | <a href="https://www.encodeproject.org/files/ENCFF620VTJ/@/download/ENCFF620VTJ.bed.gz">https://www.encodeproject.org/files/ENCFF620VTJ/@/download/ENCFF620VTJ.bed.gz</a> |
| ENCFF423JET | ENCSR212LAZ | <a href="https://www.encodeproject.org/files/ENCFF423JET/@/download/ENCFF423JET.bed.gz">https://www.encodeproject.org/files/ENCFF423JET/@/download/ENCFF423JET.bed.gz</a> |
| ENCFF072LFQ | ENCSR286STX | <a href="https://www.encodeproject.org/files/ENCFF072LFQ/@/download/ENCFF072LFQ.bed.gz">https://www.encodeproject.org/files/ENCFF072LFQ/@/download/ENCFF072LFQ.bed.gz</a> |
| ENCFF122SGC | ENCSR584AXZ | <a href="https://www.encodeproject.org/files/ENCFF122SGC/@/download/ENCFF122SGC.bed.gz">https://www.encodeproject.org/files/ENCFF122SGC/@/download/ENCFF122SGC.bed.gz</a> |
| ENCFF231FCU | ENCSR584AXZ | <a href="https://www.encodeproject.org/files/ENCFF231FCU/@/download/ENCFF231FCU.bed.gz">https://www.encodeproject.org/files/ENCFF231FCU/@/download/ENCFF231FCU.bed.gz</a> |
| ENCFF560QLT | ENCSR390SLL | <a href="https://www.encodeproject.org/files/ENCFF560QLT/@/download/ENCFF560QLT.bed.gz">https://www.encodeproject.org/files/ENCFF560QLT/@/download/ENCFF560QLT.bed.gz</a> |
| ENCFF024FSS | ENCSR390SLL | <a href="https://www.encodeproject.org/files/ENCFF024FSS/@/download/ENCFF024FSS.bed.gz">https://www.encodeproject.org/files/ENCFF024FSS/@/download/ENCFF024FSS.bed.gz</a> |
| ENCFF778HMH | ENCSR948MQC | <a href="https://www.encodeproject.org/files/ENCFF778HMH/@/download/ENCFF778HMH.bed.gz">https://www.encodeproject.org/files/ENCFF778HMH/@/download/ENCFF778HMH.bed.gz</a> |
| ENCFF718VNX | ENCSR485TLP | <a href="https://www.encodeproject.org/files/ENCFF718VNX/@/download/ENCFF718VNX.bed.gz">https://www.encodeproject.org/files/ENCFF718VNX/@/download/ENCFF718VNX.bed.gz</a> |
| ENCFF930TUO | ENCSR485TLP | <a href="https://www.encodeproject.org/files/ENCFF930TUO/@/download/ENCFF930TUO.bed.gz">https://www.encodeproject.org/files/ENCFF930TUO/@/download/ENCFF930TUO.bed.gz</a> |
| ENCFF330KWE | ENCSR485TLP | <a href="https://www.encodeproject.org/files/ENCFF330KWE/@/download/ENCFF330KWE.bed.gz">https://www.encodeproject.org/files/ENCFF330KWE/@/download/ENCFF330KWE.bed.gz</a> |
| ENCFF067WME | ENCSR485TLP | <a href="https://www.encodeproject.org/files/ENCFF067WME/@/download/ENCFF067WME.bed.gz">https://www.encodeproject.org/files/ENCFF067WME/@/download/ENCFF067WME.bed.gz</a> |
| ENCFF814ETV | ENCSR485TLP | <a href="https://www.encodeproject.org/files/ENCFF814ETV/@/download/ENCFF814ETV.bed.gz">https://www.encodeproject.org/files/ENCFF814ETV/@/download/ENCFF814ETV.bed.gz</a> |
| ENCFF981DWW | ENCSR485TLP | <a href="https://www.encodeproject.org/files/ENCFF981DWW/@/download/ENCFF981DWW.bed.gz">https://www.encodeproject.org/files/ENCFF981DWW/@/download/ENCFF981DWW.bed.gz</a> |
| ENCFF086BQP | ENCSR485TLP | <a href="https://www.encodeproject.org/files/ENCFF086BQP/@/download/ENCFF086BQP.bed.gz">https://www.encodeproject.org/files/ENCFF086BQP/@/download/ENCFF086BQP.bed.gz</a> |
| ENCFF851GXJ | ENCSR765MXG | <a href="https://www.encodeproject.org/files/ENCFF851GXJ/@/download/ENCFF851GXJ.bed.gz">https://www.encodeproject.org/files/ENCFF851GXJ/@/download/ENCFF851GXJ.bed.gz</a> |
| ENCFF883WHT | ENCSR765MXG | <a href="https://www.encodeproject.org/files/ENCFF883WHT/@/download/ENCFF883WHT.bed.gz">https://www.encodeproject.org/files/ENCFF883WHT/@/download/ENCFF883WHT.bed.gz</a> |
| ENCFF950PSB | ENCSR914DTI | <a href="https://www.encodeproject.org/files/ENCFF950PSB/@/download/ENCFF950PSB.bed.gz">https://www.encodeproject.org/files/ENCFF950PSB/@/download/ENCFF950PSB.bed.gz</a> |
| ENCFF871QBR | ENCSR637XSC | <a href="https://www.encodeproject.org/files/ENCFF871QBR/@/download/ENCFF871QBR.bed.gz">https://www.encodeproject.org/files/ENCFF871QBR/@/download/ENCFF871QBR.bed.gz</a> |

|             |             |                                                                                                                                                                           |
|-------------|-------------|---------------------------------------------------------------------------------------------------------------------------------------------------------------------------|
| ENCFF223HZQ | ENCSR637XSC | <a href="https://www.encodeproject.org/files/ENCFF223HZQ/@/download/ENCFF223HZQ.bed.gz">https://www.encodeproject.org/files/ENCFF223HZQ/@/download/ENCFF223HZQ.bed.gz</a> |
| ENCFF287FYP | ENCSR637XSC | <a href="https://www.encodeproject.org/files/ENCFF287FYP/@/download/ENCFF287FYP.bed.gz">https://www.encodeproject.org/files/ENCFF287FYP/@/download/ENCFF287FYP.bed.gz</a> |
| ENCFF912ESR | ENCSR637XSC | <a href="https://www.encodeproject.org/files/ENCFF912ESR/@/download/ENCFF912ESR.bed.gz">https://www.encodeproject.org/files/ENCFF912ESR/@/download/ENCFF912ESR.bed.gz</a> |
| ENCFF172DEA | ENCSR637XSC | <a href="https://www.encodeproject.org/files/ENCFF172DEA/@/download/ENCFF172DEA.bed.gz">https://www.encodeproject.org/files/ENCFF172DEA/@/download/ENCFF172DEA.bed.gz</a> |
| ENCFF348YMZ | ENCSR637XSC | <a href="https://www.encodeproject.org/files/ENCFF348YMZ/@/download/ENCFF348YMZ.bed.gz">https://www.encodeproject.org/files/ENCFF348YMZ/@/download/ENCFF348YMZ.bed.gz</a> |
| ENCFF713HRW | ENCSR637XSC | <a href="https://www.encodeproject.org/files/ENCFF713HRW/@/download/ENCFF713HRW.bed.gz">https://www.encodeproject.org/files/ENCFF713HRW/@/download/ENCFF713HRW.bed.gz</a> |
| ENCFF342MRG | ENCSR291GJU | <a href="https://www.encodeproject.org/files/ENCFF342MRG/@/download/ENCFF342MRG.bed.gz">https://www.encodeproject.org/files/ENCFF342MRG/@/download/ENCFF342MRG.bed.gz</a> |
| ENCFF455ILU | ENCSR291GJU | <a href="https://www.encodeproject.org/files/ENCFF455ILU/@/download/ENCFF455ILU.bed.gz">https://www.encodeproject.org/files/ENCFF455ILU/@/download/ENCFF455ILU.bed.gz</a> |
| ENCFF828BPY | ENCSR291GJU | <a href="https://www.encodeproject.org/files/ENCFF828BPY/@/download/ENCFF828BPY.bed.gz">https://www.encodeproject.org/files/ENCFF828BPY/@/download/ENCFF828BPY.bed.gz</a> |
| ENCFF356TXH | ENCSR291GJU | <a href="https://www.encodeproject.org/files/ENCFF356TXH/@/download/ENCFF356TXH.bed.gz">https://www.encodeproject.org/files/ENCFF356TXH/@/download/ENCFF356TXH.bed.gz</a> |
| ENCFF415KLW | ENCSR291GJU | <a href="https://www.encodeproject.org/files/ENCFF415KLW/@/download/ENCFF415KLW.bed.gz">https://www.encodeproject.org/files/ENCFF415KLW/@/download/ENCFF415KLW.bed.gz</a> |
| ENCFF295AJP | ENCSR291GJU | <a href="https://www.encodeproject.org/files/ENCFF295AJP/@/download/ENCFF295AJP.bed.gz">https://www.encodeproject.org/files/ENCFF295AJP/@/download/ENCFF295AJP.bed.gz</a> |
| ENCFF759RMS | ENCSR291GJU | <a href="https://www.encodeproject.org/files/ENCFF759RMS/@/download/ENCFF759RMS.bed.gz">https://www.encodeproject.org/files/ENCFF759RMS/@/download/ENCFF759RMS.bed.gz</a> |
| ENCFF068ZZZ | ENCSR647AOY | <a href="https://www.encodeproject.org/files/ENCFF068ZZZ/@/download/ENCFF068ZZZ.bed.gz">https://www.encodeproject.org/files/ENCFF068ZZZ/@/download/ENCFF068ZZZ.bed.gz</a> |
| ENCFF172VSG | ENCSR846VLJ | <a href="https://www.encodeproject.org/files/ENCFF172VSG/@/download/ENCFF172VSG.bed.gz">https://www.encodeproject.org/files/ENCFF172VSG/@/download/ENCFF172VSG.bed.gz</a> |
| ENCFF487NCC | ENCSR846VLJ | <a href="https://www.encodeproject.org/files/ENCFF487NCC/@/download/ENCFF487NCC.bed.gz">https://www.encodeproject.org/files/ENCFF487NCC/@/download/ENCFF487NCC.bed.gz</a> |
| ENCFF887ARA | ENCSR654UYP | <a href="https://www.encodeproject.org/files/ENCFF887ARA/@/download/ENCFF887ARA.bed.gz">https://www.encodeproject.org/files/ENCFF887ARA/@/download/ENCFF887ARA.bed.gz</a> |
| ENCFF970MTO | ENCSR654UYP | <a href="https://www.encodeproject.org/files/ENCFF970MTO/@/download/ENCFF970MTO.bed.gz">https://www.encodeproject.org/files/ENCFF970MTO/@/download/ENCFF970MTO.bed.gz</a> |
| ENCFF816THB | ENCSR705KEB | <a href="https://www.encodeproject.org/files/ENCFF816THB/@/download/ENCFF816THB.bed.gz">https://www.encodeproject.org/files/ENCFF816THB/@/download/ENCFF816THB.bed.gz</a> |
| ENCFF360KWB | ENCSR705KEB | <a href="https://www.encodeproject.org/files/ENCFF360KWB/@/download/ENCFF360KWB.bed.gz">https://www.encodeproject.org/files/ENCFF360KWB/@/download/ENCFF360KWB.bed.gz</a> |
| ENCFF964DAT | ENCSR515CDW | <a href="https://www.encodeproject.org/files/ENCFF964DAT/@/download/ENCFF964DAT.bed.gz">https://www.encodeproject.org/files/ENCFF964DAT/@/download/ENCFF964DAT.bed.gz</a> |
| ENCFF072PVO | ENCSR515CDW | <a href="https://www.encodeproject.org/files/ENCFF072PVO/@/download/ENCFF072PVO.bed.gz">https://www.encodeproject.org/files/ENCFF072PVO/@/download/ENCFF072PVO.bed.gz</a> |
| ENCFF719IDZ | ENCSR540BML | <a href="https://www.encodeproject.org/files/ENCFF719IDZ/@/download/ENCFF719IDZ.bed.gz">https://www.encodeproject.org/files/ENCFF719IDZ/@/download/ENCFF719IDZ.bed.gz</a> |
| ENCFF463WUA | ENCSR540BML | <a href="https://www.encodeproject.org/files/ENCFF463WUA/@/download/ENCFF463WUA.bed.gz">https://www.encodeproject.org/files/ENCFF463WUA/@/download/ENCFF463WUA.bed.gz</a> |
| ENCFF925JFY | ENCSR689SDA | <a href="https://www.encodeproject.org/files/ENCFF925JFY/@/download/ENCFF925JFY.bed.gz">https://www.encodeproject.org/files/ENCFF925JFY/@/download/ENCFF925JFY.bed.gz</a> |
| ENCFF666UUK | ENCSR689SDA | <a href="https://www.encodeproject.org/files/ENCFF666UUK/@/download/ENCFF666UUK.bed.gz">https://www.encodeproject.org/files/ENCFF666UUK/@/download/ENCFF666UUK.bed.gz</a> |
| ENCFF951NYI | ENCSR096BPX | <a href="https://www.encodeproject.org/files/ENCFF951NYI/@/download/ENCFF951NYI.bed.gz">https://www.encodeproject.org/files/ENCFF951NYI/@/download/ENCFF951NYI.bed.gz</a> |
| ENCFF984VPG | ENCSR096BPX | <a href="https://www.encodeproject.org/files/ENCFF984VPG/@/download/ENCFF984VPG.bed.gz">https://www.encodeproject.org/files/ENCFF984VPG/@/download/ENCFF984VPG.bed.gz</a> |
| ENCFF849LPY | ENCSR774NXA | <a href="https://www.encodeproject.org/files/ENCFF849LPY/@/download/ENCFF849LPY.bed.gz">https://www.encodeproject.org/files/ENCFF849LPY/@/download/ENCFF849LPY.bed.gz</a> |
| ENCFF203KWW | ENCSR774NXA | <a href="https://www.encodeproject.org/files/ENCFF203KWW/@/download/ENCFF203KWW.bed.gz">https://www.encodeproject.org/files/ENCFF203KWW/@/download/ENCFF203KWW.bed.gz</a> |
| ENCFF590JMZ | ENCSR522FGI | <a href="https://www.encodeproject.org/files/ENCFF590JMZ/@/download/ENCFF590JMZ.bed.gz">https://www.encodeproject.org/files/ENCFF590JMZ/@/download/ENCFF590JMZ.bed.gz</a> |



|             |             |                                                                                                                                                                           |
|-------------|-------------|---------------------------------------------------------------------------------------------------------------------------------------------------------------------------|
| ENCFF567VUC | ENCSR522FGI | <a href="https://www.encodeproject.org/files/ENCFF567VUC/@@download/ENCFF567VUC.bed.gz">https://www.encodeproject.org/files/ENCFF567VUC/@@download/ENCFF567VUC.bed.gz</a> |
| ENCFF802ITJ | ENCSR710SMN | <a href="https://www.encodeproject.org/files/ENCFF802ITJ/@@download/ENCFF802ITJ.bed.gz">https://www.encodeproject.org/files/ENCFF802ITJ/@@download/ENCFF802ITJ.bed.gz</a> |
| ENCFF556YGF | ENCSR710SMN | <a href="https://www.encodeproject.org/files/ENCFF556YGF/@@download/ENCFF556YGF.bed.gz">https://www.encodeproject.org/files/ENCFF556YGF/@@download/ENCFF556YGF.bed.gz</a> |
| ENCFF633SCY | ENCSR955JSO | <a href="https://www.encodeproject.org/files/ENCFF633SCY/@@download/ENCFF633SCY.bed.gz">https://www.encodeproject.org/files/ENCFF633SCY/@@download/ENCFF633SCY.bed.gz</a> |
| ENCFF738IZU | ENCSR955JSO | <a href="https://www.encodeproject.org/files/ENCFF738IZU/@@download/ENCFF738IZU.bed.gz">https://www.encodeproject.org/files/ENCFF738IZU/@@download/ENCFF738IZU.bed.gz</a> |
| ENCFF381CCN | ENCSR918TVE | <a href="https://www.encodeproject.org/files/ENCFF381CCN/@@download/ENCFF381CCN.bed.gz">https://www.encodeproject.org/files/ENCFF381CCN/@@download/ENCFF381CCN.bed.gz</a> |
| ENCFF176EOV | ENCSR918TVE | <a href="https://www.encodeproject.org/files/ENCFF176EOV/@@download/ENCFF176EOV.bed.gz">https://www.encodeproject.org/files/ENCFF176EOV/@@download/ENCFF176EOV.bed.gz</a> |
| ENCFF870OMG | ENCSR630REB | <a href="https://www.encodeproject.org/files/ENCFF870OMG/@@download/ENCFF870OMG.bed.gz">https://www.encodeproject.org/files/ENCFF870OMG/@@download/ENCFF870OMG.bed.gz</a> |
| ENCFF831JKU | ENCSR630REB | <a href="https://www.encodeproject.org/files/ENCFF831JKU/@@download/ENCFF831JKU.bed.gz">https://www.encodeproject.org/files/ENCFF831JKU/@@download/ENCFF831JKU.bed.gz</a> |
| ENCFF126OSM | ENCSR864ADD | <a href="https://www.encodeproject.org/files/ENCFF126OSM/@@download/ENCFF126OSM.bed.gz">https://www.encodeproject.org/files/ENCFF126OSM/@@download/ENCFF126OSM.bed.gz</a> |
| ENCFF967XFP | ENCSR864ADD | <a href="https://www.encodeproject.org/files/ENCFF967XFP/@@download/ENCFF967XFP.bed.gz">https://www.encodeproject.org/files/ENCFF967XFP/@@download/ENCFF967XFP.bed.gz</a> |
| ENCFF917REN | ENCSR095QNB | <a href="https://www.encodeproject.org/files/ENCFF917REN/@@download/ENCFF917REN.bed.gz">https://www.encodeproject.org/files/ENCFF917REN/@@download/ENCFF917REN.bed.gz</a> |
| ENCFF945SYZ | ENCSR095QNB | <a href="https://www.encodeproject.org/files/ENCFF945SYZ/@@download/ENCFF945SYZ.bed.gz">https://www.encodeproject.org/files/ENCFF945SYZ/@@download/ENCFF945SYZ.bed.gz</a> |
| ENCFF614SMH | ENCSR095QNB | <a href="https://www.encodeproject.org/files/ENCFF614SMH/@@download/ENCFF614SMH.bed.gz">https://www.encodeproject.org/files/ENCFF614SMH/@@download/ENCFF614SMH.bed.gz</a> |
| ENCFF346CZA | ENCSR095QNB | <a href="https://www.encodeproject.org/files/ENCFF346CZA/@@download/ENCFF346CZA.bed.gz">https://www.encodeproject.org/files/ENCFF346CZA/@@download/ENCFF346CZA.bed.gz</a> |
| ENCFF316BML | ENCSR773USD | <a href="https://www.encodeproject.org/files/ENCFF316BML/@@download/ENCFF316BML.bed.gz">https://www.encodeproject.org/files/ENCFF316BML/@@download/ENCFF316BML.bed.gz</a> |
| ENCFF075WWH | ENCSR773USD | <a href="https://www.encodeproject.org/files/ENCFF075WWH/@@download/ENCFF075WWH.bed.gz">https://www.encodeproject.org/files/ENCFF075WWH/@@download/ENCFF075WWH.bed.gz</a> |
| ENCFF319FIY | ENCSR386HAZ | <a href="https://www.encodeproject.org/files/ENCFF319FIY/@@download/ENCFF319FIY.bed.gz">https://www.encodeproject.org/files/ENCFF319FIY/@@download/ENCFF319FIY.bed.gz</a> |
| ENCFF609YMS | ENCSR386HAZ | <a href="https://www.encodeproject.org/files/ENCFF609YMS/@@download/ENCFF609YMS.bed.gz">https://www.encodeproject.org/files/ENCFF609YMS/@@download/ENCFF609YMS.bed.gz</a> |
| ENCFF408QRF | ENCSR491VXJ | <a href="https://www.encodeproject.org/files/ENCFF408QRF/@@download/ENCFF408QRF.bed.gz">https://www.encodeproject.org/files/ENCFF408QRF/@@download/ENCFF408QRF.bed.gz</a> |
| ENCFF464HPU | ENCSR491VXJ | <a href="https://www.encodeproject.org/files/ENCFF464HPU/@@download/ENCFF464HPU.bed.gz">https://www.encodeproject.org/files/ENCFF464HPU/@@download/ENCFF464HPU.bed.gz</a> |
| ENCFF525ZRG | ENCSR310RJN | <a href="https://www.encodeproject.org/files/ENCFF525ZRG/@@download/ENCFF525ZRG.bed.gz">https://www.encodeproject.org/files/ENCFF525ZRG/@@download/ENCFF525ZRG.bed.gz</a> |
| ENCFF308DNB | ENCSR846ZBX | <a href="https://www.encodeproject.org/files/ENCFF308DNB/@@download/ENCFF308DNB.bed.gz">https://www.encodeproject.org/files/ENCFF308DNB/@@download/ENCFF308DNB.bed.gz</a> |
| ENCFF544RPU | ENCSR846ZBX | <a href="https://www.encodeproject.org/files/ENCFF544RPU/@@download/ENCFF544RPU.bed.gz">https://www.encodeproject.org/files/ENCFF544RPU/@@download/ENCFF544RPU.bed.gz</a> |
| ENCFF780NPL | ENCSR260ZIV | <a href="https://www.encodeproject.org/files/ENCFF780NPL/@@download/ENCFF780NPL.bed.gz">https://www.encodeproject.org/files/ENCFF780NPL/@@download/ENCFF780NPL.bed.gz</a> |
| ENCFF580UXE | ENCSR260ZIV | <a href="https://www.encodeproject.org/files/ENCFF580UXE/@@download/ENCFF580UXE.bed.gz">https://www.encodeproject.org/files/ENCFF580UXE/@@download/ENCFF580UXE.bed.gz</a> |
| ENCFF898WYV | ENCSR133CMC | <a href="https://www.encodeproject.org/files/ENCFF898WYV/@@download/ENCFF898WYV.bed.gz">https://www.encodeproject.org/files/ENCFF898WYV/@@download/ENCFF898WYV.bed.gz</a> |
| ENCFF889SBW | ENCSR651SOJ | <a href="https://www.encodeproject.org/files/ENCFF889SBW/@@download/ENCFF889SBW.bed.gz">https://www.encodeproject.org/files/ENCFF889SBW/@@download/ENCFF889SBW.bed.gz</a> |
| ENCFF389YDC | ENCSR651SOJ | <a href="https://www.encodeproject.org/files/ENCFF389YDC/@@download/ENCFF389YDC.bed.gz">https://www.encodeproject.org/files/ENCFF389YDC/@@download/ENCFF389YDC.bed.gz</a> |
| ENCFF520ASW | ENCSR074WMH | <a href="https://www.encodeproject.org/files/ENCFF520ASW/@@download/ENCFF520ASW.bed.gz">https://www.encodeproject.org/files/ENCFF520ASW/@@download/ENCFF520ASW.bed.gz</a> |
| ENCFF184BRH | ENCSR074WMH | <a href="https://www.encodeproject.org/files/ENCFF184BRH/@@download/ENCFF184BRH.bed.gz">https://www.encodeproject.org/files/ENCFF184BRH/@@download/ENCFF184BRH.bed.gz</a> |

|              |             |                                                                                                                                                                               |
|--------------|-------------|-------------------------------------------------------------------------------------------------------------------------------------------------------------------------------|
| ENCFF873MVF  | ENCSR437OOJ | <a href="https://www.encodeproject.org/files/ENCFF873MVF/@/download/ENCFF873MVF.bed.gz">https://www.encodeproject.org/files/ENCFF873MVF/@/download/ENCFF873MVF.bed.gz</a>     |
| ENCFF315UYG  | ENCSR437OOJ | <a href="https://www.encodeproject.org/files/ENCFF315UYG/@/download/ENCFF315UYG.bed.gz">https://www.encodeproject.org/files/ENCFF315UYG/@/download/ENCFF315UYG.bed.gz</a>     |
| ENCFF179JFB  | ENCSR053SGP | <a href="https://www.encodeproject.org/files/ENCFF179JFB/@/download/ENCFF179JFB.bed.gz">https://www.encodeproject.org/files/ENCFF179JFB/@/download/ENCFF179JFB.bed.gz</a>     |
| ENCFF605QTK  | ENCSR808ZMK | <a href="https://www.encodeproject.org/files/ENCFF605QTK/@/download/ENCFF605QTK.bed.gz">https://www.encodeproject.org/files/ENCFF605QTK/@/download/ENCFF605QTK.bed.gz</a>     |
| ENCFF201EYO  | ENCSR808ZMK | <a href="https://www.encodeproject.org/files/ENCFF201EYO/@/download/ENCFF201EYO.bed.gz">https://www.encodeproject.org/files/ENCFF201EYO/@/download/ENCFF201EYO.bed.gz</a>     |
| ENCFF112NVU  | ENCSR117PYB | <a href="https://www.encodeproject.org/files/ENCFF112NVU/@/download/ENCFF112NVU.bed.gz">https://www.encodeproject.org/files/ENCFF112NVU/@/download/ENCFF112NVU.bed.gz</a>     |
| ENCFF174HPZ  | ENCSR117PYB | <a href="https://www.encodeproject.org/files/ENCFF174HPZ/@/download/ENCFF174HPZ.bed.gz">https://www.encodeproject.org/files/ENCFF174HPZ/@/download/ENCFF174HPZ.bed.gz</a>     |
| ENCFF144VSH  | ENCSR213YPO | <a href="https://www.encodeproject.org/files/ENCFF144VSH/@/download/ENCFF144VSH.bed.gz">https://www.encodeproject.org/files/ENCFF144VSH/@/download/ENCFF144VSH.bed.gz</a>     |
| ENCFF783MY Y | ENCSR213YPO | <a href="https://www.encodeproject.org/files/ENCFF783MY Y/@/download/ENCFF783MY Y.bed.gz">https://www.encodeproject.org/files/ENCFF783MY Y/@/download/ENCFF783MY Y.bed.gz</a> |
| ENCFF298TYK  | ENCSR258JCL | <a href="https://www.encodeproject.org/files/ENCFF298TYK/@/download/ENCFF298TYK.bed.gz">https://www.encodeproject.org/files/ENCFF298TYK/@/download/ENCFF298TYK.bed.gz</a>     |
| ENCFF034WCY  | ENCSR258JCL | <a href="https://www.encodeproject.org/files/ENCFF034WCY/@/download/ENCFF034WCY.bed.gz">https://www.encodeproject.org/files/ENCFF034WCY/@/download/ENCFF034WCY.bed.gz</a>     |
| ENCFF773CEZ  | ENCSR373TDL | <a href="https://www.encodeproject.org/files/ENCFF773CEZ/@/download/ENCFF773CEZ.bed.gz">https://www.encodeproject.org/files/ENCFF773CEZ/@/download/ENCFF773CEZ.bed.gz</a>     |
| ENCFF522FNJ  | ENCSR373TDL | <a href="https://www.encodeproject.org/files/ENCFF522FNJ/@/download/ENCFF522FNJ.bed.gz">https://www.encodeproject.org/files/ENCFF522FNJ/@/download/ENCFF522FNJ.bed.gz</a>     |
| ENCFF199VHV  | ENCSR563ZNI | <a href="https://www.encodeproject.org/files/ENCFF199VHV/@/download/ENCFF199VHV.bed.gz">https://www.encodeproject.org/files/ENCFF199VHV/@/download/ENCFF199VHV.bed.gz</a>     |
| ENCFF455PLR  | ENCSR788TRR | <a href="https://www.encodeproject.org/files/ENCFF455PLR/@/download/ENCFF455PLR.bed.gz">https://www.encodeproject.org/files/ENCFF455PLR/@/download/ENCFF455PLR.bed.gz</a>     |
| ENCFF963YOX  | ENCSR788TRR | <a href="https://www.encodeproject.org/files/ENCFF963YOX/@/download/ENCFF963YOX.bed.gz">https://www.encodeproject.org/files/ENCFF963YOX/@/download/ENCFF963YOX.bed.gz</a>     |
| ENCFF431CPR  | ENCSR072UYN | <a href="https://www.encodeproject.org/files/ENCFF431CPR/@/download/ENCFF431CPR.bed.gz">https://www.encodeproject.org/files/ENCFF431CPR/@/download/ENCFF431CPR.bed.gz</a>     |
| ENCFF277OGS  | ENCSR072UYN | <a href="https://www.encodeproject.org/files/ENCFF277OGS/@/download/ENCFF277OGS.bed.gz">https://www.encodeproject.org/files/ENCFF277OGS/@/download/ENCFF277OGS.bed.gz</a>     |
| ENCFF203EQG  | ENCSR152PSA | <a href="https://www.encodeproject.org/files/ENCFF203EQG/@/download/ENCFF203EQG.bed.gz">https://www.encodeproject.org/files/ENCFF203EQG/@/download/ENCFF203EQG.bed.gz</a>     |
| ENCFF804EIN  | ENCSR152PSA | <a href="https://www.encodeproject.org/files/ENCFF804EIN/@/download/ENCFF804EIN.bed.gz">https://www.encodeproject.org/files/ENCFF804EIN/@/download/ENCFF804EIN.bed.gz</a>     |
| ENCFF873GXL  | ENCSR210NKB | <a href="https://www.encodeproject.org/files/ENCFF873GXL/@/download/ENCFF873GXL.bed.gz">https://www.encodeproject.org/files/ENCFF873GXL/@/download/ENCFF873GXL.bed.gz</a>     |
| ENCFF643ZJJ  | ENCSR210NKB | <a href="https://www.encodeproject.org/files/ENCFF643ZJJ/@/download/ENCFF643ZJJ.bed.gz">https://www.encodeproject.org/files/ENCFF643ZJJ/@/download/ENCFF643ZJJ.bed.gz</a>     |
| ENCFF305GIG  | ENCSR868FGK | <a href="https://www.encodeproject.org/files/ENCFF305GIG/@/download/ENCFF305GIG.bed.gz">https://www.encodeproject.org/files/ENCFF305GIG/@/download/ENCFF305GIG.bed.gz</a>     |
| ENCFF760HHY  | ENCSR868FGK | <a href="https://www.encodeproject.org/files/ENCFF760HHY/@/download/ENCFF760HHY.bed.gz">https://www.encodeproject.org/files/ENCFF760HHY/@/download/ENCFF760HHY.bed.gz</a>     |
| ENCFF545AQB  | ENCSR868FGK | <a href="https://www.encodeproject.org/files/ENCFF545AQB/@/download/ENCFF545AQB.bed.gz">https://www.encodeproject.org/files/ENCFF545AQB/@/download/ENCFF545AQB.bed.gz</a>     |
| ENCFF222VTK  | ENCSR868FGK | <a href="https://www.encodeproject.org/files/ENCFF222VTK/@/download/ENCFF222VTK.bed.gz">https://www.encodeproject.org/files/ENCFF222VTK/@/download/ENCFF222VTK.bed.gz</a>     |
| ENCFF530FMG  | ENCSR868FGK | <a href="https://www.encodeproject.org/files/ENCFF530FMG/@/download/ENCFF530FMG.bed.gz">https://www.encodeproject.org/files/ENCFF530FMG/@/download/ENCFF530FMG.bed.gz</a>     |
| ENCFF748OSQ  | ENCSR868FGK | <a href="https://www.encodeproject.org/files/ENCFF748OSQ/@/download/ENCFF748OSQ.bed.gz">https://www.encodeproject.org/files/ENCFF748OSQ/@/download/ENCFF748OSQ.bed.gz</a>     |
| ENCFF966AKO  | ENCSR868FGK | <a href="https://www.encodeproject.org/files/ENCFF966AKO/@/download/ENCFF966AKO.bed.gz">https://www.encodeproject.org/files/ENCFF966AKO/@/download/ENCFF966AKO.bed.gz</a>     |
| ENCFF912MCC  | ENCSR516CPW | <a href="https://www.encodeproject.org/files/ENCFF912MCC/@/download/ENCFF912MCC.bed.gz">https://www.encodeproject.org/files/ENCFF912MCC/@/download/ENCFF912MCC.bed.gz</a>     |
| ENCFF300UPI  | ENCSR846VPV | <a href="https://www.encodeproject.org/files/ENCFF300UPI/@/download/ENCFF300UPI.bed.gz">https://www.encodeproject.org/files/ENCFF300UPI/@/download/ENCFF300UPI.bed.gz</a>     |

|             |             |                                                                                                                                                                           |
|-------------|-------------|---------------------------------------------------------------------------------------------------------------------------------------------------------------------------|
| ENCFF303AKJ | ENCSR846VPV | <a href="https://www.encodeproject.org/files/ENCFF303AKJ/@@download/ENCFF303AKJ.bed.gz">https://www.encodeproject.org/files/ENCFF303AKJ/@@download/ENCFF303AKJ.bed.gz</a> |
| ENCFF882FLC | ENCSR422SUG | <a href="https://www.encodeproject.org/files/ENCFF882FLC/@@download/ENCFF882FLC.bed.gz">https://www.encodeproject.org/files/ENCFF882FLC/@@download/ENCFF882FLC.bed.gz</a> |
| ENCFF204NII | ENCSR422SUG | <a href="https://www.encodeproject.org/files/ENCFF204NII/@@download/ENCFF204NII.bed.gz">https://www.encodeproject.org/files/ENCFF204NII/@@download/ENCFF204NII.bed.gz</a> |
| ENCFF882OVP | ENCSR422SUG | <a href="https://www.encodeproject.org/files/ENCFF882OVP/@@download/ENCFF882OVP.bed.gz">https://www.encodeproject.org/files/ENCFF882OVP/@@download/ENCFF882OVP.bed.gz</a> |
| ENCFF905GGG | ENCSR422SUG | <a href="https://www.encodeproject.org/files/ENCFF905GGG/@@download/ENCFF905GGG.bed.gz">https://www.encodeproject.org/files/ENCFF905GGG/@@download/ENCFF905GGG.bed.gz</a> |
| ENCFF885TNX | ENCSR308HPZ | <a href="https://www.encodeproject.org/files/ENCFF885TNX/@@download/ENCFF885TNX.bed.gz">https://www.encodeproject.org/files/ENCFF885TNX/@@download/ENCFF885TNX.bed.gz</a> |
| ENCFF461RJQ | ENCSR308HPZ | <a href="https://www.encodeproject.org/files/ENCFF461RJQ/@@download/ENCFF461RJQ.bed.gz">https://www.encodeproject.org/files/ENCFF461RJQ/@@download/ENCFF461RJQ.bed.gz</a> |
| ENCFF791RKW | ENCSR042AWH | <a href="https://www.encodeproject.org/files/ENCFF791RKW/@@download/ENCFF791RKW.bed.gz">https://www.encodeproject.org/files/ENCFF791RKW/@@download/ENCFF791RKW.bed.gz</a> |
| ENCFF851SSE | ENCSR042AWH | <a href="https://www.encodeproject.org/files/ENCFF851SSE/@@download/ENCFF851SSE.bed.gz">https://www.encodeproject.org/files/ENCFF851SSE/@@download/ENCFF851SSE.bed.gz</a> |
| ENCFF314RIW | ENCSR042AWH | <a href="https://www.encodeproject.org/files/ENCFF314RIW/@@download/ENCFF314RIW.bed.gz">https://www.encodeproject.org/files/ENCFF314RIW/@@download/ENCFF314RIW.bed.gz</a> |
| ENCFF438JMM | ENCSR042AWH | <a href="https://www.encodeproject.org/files/ENCFF438JMM/@@download/ENCFF438JMM.bed.gz">https://www.encodeproject.org/files/ENCFF438JMM/@@download/ENCFF438JMM.bed.gz</a> |
| ENCFF133HUE | ENCSR040DJK | <a href="https://www.encodeproject.org/files/ENCFF133HUE/@@download/ENCFF133HUE.bed.gz">https://www.encodeproject.org/files/ENCFF133HUE/@@download/ENCFF133HUE.bed.gz</a> |
| ENCFF784MGH | ENCSR040DJK | <a href="https://www.encodeproject.org/files/ENCFF784MGH/@@download/ENCFF784MGH.bed.gz">https://www.encodeproject.org/files/ENCFF784MGH/@@download/ENCFF784MGH.bed.gz</a> |
| ENCFF278WQH | ENCSR201FIW | <a href="https://www.encodeproject.org/files/ENCFF278WQH/@@download/ENCFF278WQH.bed.gz">https://www.encodeproject.org/files/ENCFF278WQH/@@download/ENCFF278WQH.bed.gz</a> |
| ENCFF675XYC | ENCSR201FIW | <a href="https://www.encodeproject.org/files/ENCFF675XYC/@@download/ENCFF675XYC.bed.gz">https://www.encodeproject.org/files/ENCFF675XYC/@@download/ENCFF675XYC.bed.gz</a> |
| ENCFF356UPB | ENCSR551CSY | <a href="https://www.encodeproject.org/files/ENCFF356UPB/@@download/ENCFF356UPB.bed.gz">https://www.encodeproject.org/files/ENCFF356UPB/@@download/ENCFF356UPB.bed.gz</a> |
| ENCFF774JIK | ENCSR551CSY | <a href="https://www.encodeproject.org/files/ENCFF774JIK/@@download/ENCFF774JIK.bed.gz">https://www.encodeproject.org/files/ENCFF774JIK/@@download/ENCFF774JIK.bed.gz</a> |
| ENCFF193HEJ | ENCSR551CSY | <a href="https://www.encodeproject.org/files/ENCFF193HEJ/@@download/ENCFF193HEJ.bed.gz">https://www.encodeproject.org/files/ENCFF193HEJ/@@download/ENCFF193HEJ.bed.gz</a> |
| ENCFF164FNM | ENCSR551CSY | <a href="https://www.encodeproject.org/files/ENCFF164FNM/@@download/ENCFF164FNM.bed.gz">https://www.encodeproject.org/files/ENCFF164FNM/@@download/ENCFF164FNM.bed.gz</a> |
| ENCFF049BCQ | ENCSR551CSY | <a href="https://www.encodeproject.org/files/ENCFF049BCQ/@@download/ENCFF049BCQ.bed.gz">https://www.encodeproject.org/files/ENCFF049BCQ/@@download/ENCFF049BCQ.bed.gz</a> |
| ENCFF385QXA | ENCSR551CSY | <a href="https://www.encodeproject.org/files/ENCFF385QXA/@@download/ENCFF385QXA.bed.gz">https://www.encodeproject.org/files/ENCFF385QXA/@@download/ENCFF385QXA.bed.gz</a> |
| ENCFF368MPK | ENCSR551CSY | <a href="https://www.encodeproject.org/files/ENCFF368MPK/@@download/ENCFF368MPK.bed.gz">https://www.encodeproject.org/files/ENCFF368MPK/@@download/ENCFF368MPK.bed.gz</a> |
| ENCFF169RTS | ENCSR551CSY | <a href="https://www.encodeproject.org/files/ENCFF169RTS/@@download/ENCFF169RTS.bed.gz">https://www.encodeproject.org/files/ENCFF169RTS/@@download/ENCFF169RTS.bed.gz</a> |
| ENCFF912IDR | ENCSR607BTF | <a href="https://www.encodeproject.org/files/ENCFF912IDR/@@download/ENCFF912IDR.bed.gz">https://www.encodeproject.org/files/ENCFF912IDR/@@download/ENCFF912IDR.bed.gz</a> |
| ENCFF347HUL | ENCSR607BTF | <a href="https://www.encodeproject.org/files/ENCFF347HUL/@@download/ENCFF347HUL.bed.gz">https://www.encodeproject.org/files/ENCFF347HUL/@@download/ENCFF347HUL.bed.gz</a> |
| ENCFF461IGU | ENCSR241OBO | <a href="https://www.encodeproject.org/files/ENCFF461IGU/@@download/ENCFF461IGU.bed.gz">https://www.encodeproject.org/files/ENCFF461IGU/@@download/ENCFF461IGU.bed.gz</a> |
| ENCFF315XZD | ENCSR241OBO | <a href="https://www.encodeproject.org/files/ENCFF315XZD/@@download/ENCFF315XZD.bed.gz">https://www.encodeproject.org/files/ENCFF315XZD/@@download/ENCFF315XZD.bed.gz</a> |
| ENCFF679YNL | ENCSR404LLJ | <a href="https://www.encodeproject.org/files/ENCFF679YNL/@@download/ENCFF679YNL.bed.gz">https://www.encodeproject.org/files/ENCFF679YNL/@@download/ENCFF679YNL.bed.gz</a> |
| ENCFF995XLK | ENCSR404LLJ | <a href="https://www.encodeproject.org/files/ENCFF995XLK/@@download/ENCFF995XLK.bed.gz">https://www.encodeproject.org/files/ENCFF995XLK/@@download/ENCFF995XLK.bed.gz</a> |
| ENCFF913BUA | ENCSR831KAH | <a href="https://www.encodeproject.org/files/ENCFF913BUA/@@download/ENCFF913BUA.bed.gz">https://www.encodeproject.org/files/ENCFF913BUA/@@download/ENCFF913BUA.bed.gz</a> |
| ENCFF623GOH | ENCSR831KAH | <a href="https://www.encodeproject.org/files/ENCFF623GOH/@@download/ENCFF623GOH.bed.gz">https://www.encodeproject.org/files/ENCFF623GOH/@@download/ENCFF623GOH.bed.gz</a> |

|             |             |                                                                                                                                                                           |
|-------------|-------------|---------------------------------------------------------------------------------------------------------------------------------------------------------------------------|
| ENCFF510PGR | ENCSR761TKU | <a href="https://www.encodeproject.org/files/ENCFF510PGR/@/download/ENCFF510PGR.bed.gz">https://www.encodeproject.org/files/ENCFF510PGR/@/download/ENCFF510PGR.bed.gz</a> |
| ENCFF668ARP | ENCSR761TKU | <a href="https://www.encodeproject.org/files/ENCFF668ARP/@/download/ENCFF668ARP.bed.gz">https://www.encodeproject.org/files/ENCFF668ARP/@/download/ENCFF668ARP.bed.gz</a> |
| ENCFF235JZB | ENCSR200OML | <a href="https://www.encodeproject.org/files/ENCFF235JZB/@/download/ENCFF235JZB.bed.gz">https://www.encodeproject.org/files/ENCFF235JZB/@/download/ENCFF235JZB.bed.gz</a> |
| ENCFF383XOM | ENCSR200OML | <a href="https://www.encodeproject.org/files/ENCFF383XOM/@/download/ENCFF383XOM.bed.gz">https://www.encodeproject.org/files/ENCFF383XOM/@/download/ENCFF383XOM.bed.gz</a> |
| ENCFF114GDS | ENCSR200OML | <a href="https://www.encodeproject.org/files/ENCFF114GDS/@/download/ENCFF114GDS.bed.gz">https://www.encodeproject.org/files/ENCFF114GDS/@/download/ENCFF114GDS.bed.gz</a> |
| ENCFF982UNH | ENCSR200OML | <a href="https://www.encodeproject.org/files/ENCFF982UNH/@/download/ENCFF982UNH.bed.gz">https://www.encodeproject.org/files/ENCFF982UNH/@/download/ENCFF982UNH.bed.gz</a> |
| ENCFF329NTV | ENCSR996ZCR | <a href="https://www.encodeproject.org/files/ENCFF329NTV/@/download/ENCFF329NTV.bed.gz">https://www.encodeproject.org/files/ENCFF329NTV/@/download/ENCFF329NTV.bed.gz</a> |
| ENCFF250ANB | ENCSR996ZCR | <a href="https://www.encodeproject.org/files/ENCFF250ANB/@/download/ENCFF250ANB.bed.gz">https://www.encodeproject.org/files/ENCFF250ANB/@/download/ENCFF250ANB.bed.gz</a> |
| ENCFF775HDQ | ENCSR153IUB | <a href="https://www.encodeproject.org/files/ENCFF775HDQ/@/download/ENCFF775HDQ.bed.gz">https://www.encodeproject.org/files/ENCFF775HDQ/@/download/ENCFF775HDQ.bed.gz</a> |
| ENCFF173AVZ | ENCSR153IUB | <a href="https://www.encodeproject.org/files/ENCFF173AVZ/@/download/ENCFF173AVZ.bed.gz">https://www.encodeproject.org/files/ENCFF173AVZ/@/download/ENCFF173AVZ.bed.gz</a> |
| ENCFF816GCG | ENCSR670REK | <a href="https://www.encodeproject.org/files/ENCFF816GCG/@/download/ENCFF816GCG.bed.gz">https://www.encodeproject.org/files/ENCFF816GCG/@/download/ENCFF816GCG.bed.gz</a> |
| ENCFF456JOB | ENCSR670REK | <a href="https://www.encodeproject.org/files/ENCFF456JOB/@/download/ENCFF456JOB.bed.gz">https://www.encodeproject.org/files/ENCFF456JOB/@/download/ENCFF456JOB.bed.gz</a> |
| ENCFF822SDP | ENCSR851SBY | <a href="https://www.encodeproject.org/files/ENCFF822SDP/@/download/ENCFF822SDP.bed.gz">https://www.encodeproject.org/files/ENCFF822SDP/@/download/ENCFF822SDP.bed.gz</a> |
| ENCFF430VEQ | ENCSR851SBY | <a href="https://www.encodeproject.org/files/ENCFF430VEQ/@/download/ENCFF430VEQ.bed.gz">https://www.encodeproject.org/files/ENCFF430VEQ/@/download/ENCFF430VEQ.bed.gz</a> |

Table S2 Computing Power and Processing Time for Each Model

| <b>Computation<br/>power</b> | <b>Model</b>     | <b>PBMC</b> | <b>Brain</b> |
|------------------------------|------------------|-------------|--------------|
| One GPU                      | <b>scEpiLock</b> | 1:39:53     | 4:14:56      |
|                              | DeepSEA          | 1:06:06     | 2:47:59      |
|                              | DanQ             | 1:19:02     | 3:23:34      |
| One CPU                      | Random forest    | 0:06:25     | 0:07:54      |

Table S3 H3K27ac Enrichment in Key and Non-key Regions

| <b>Data</b> | <b>Region</b> | <b>H3K27ac<br/>enrichment</b> | <b>p-value</b> |
|-------------|---------------|-------------------------------|----------------|
| PBMC        | key           | 0.554                         | <2.2e-16       |
|             | Non-key       | 0.412                         |                |
| Brain       | key           | 1.448                         | <2.2e-16       |
|             | Non-key       | 0.987                         |                |
